# 1 **EOMES and IL-10 regulate anti-tumor activity of PD-1<sup>+</sup> CD4<sup>+</sup> T-cells in**

## 2 **B-cell Non-Hodgkin lymphoma**

3

4 Philipp M. Roessner<sup>1\*</sup>, Laura Llaó Cid<sup>1,2\*</sup>, Ekaterina Lupa<sup>3\*</sup>, Tobias Roeder<sup>4</sup>, Marie Bordas<sup>1,2</sup>, Christoph  
5 Schiffers<sup>1,5</sup>, Ann-Christin Gaupel<sup>1</sup>, Fabian Kilpert<sup>3,6</sup>, Marit Krötschel<sup>3,7</sup>, Sebastian J. Arnold<sup>8,9</sup>, Leopold  
6 Sellner<sup>4</sup>, Stephan Stilgenbauer<sup>10</sup>, Sascha Dietrich<sup>4</sup>, Peter Lichter<sup>1</sup>, Ana Izcue<sup>3,11,12\*</sup>, and Martina  
7 Seiffert<sup>1\*</sup>

8

9 <sup>1</sup> Molecular Genetics, German Cancer Research Center (DKFZ), Heidelberg, Germany

10 <sup>2</sup> Faculty of Biosciences, University of Heidelberg, Heidelberg, Germany

11 <sup>3</sup> Max-Planck-Institute of Immunobiology and Epigenetics, Freiburg, Germany

12 <sup>4</sup> Department of Medicine V, Hematology, Oncology and Rheumatology, University of Heidelberg,  
13 Heidelberg, Germany

14 <sup>5</sup> Present address: Immunotherapy and Immunoprevention, German Cancer Research Center (DKFZ),  
15 Heidelberg, Germany and Cell Biology Research Unit (URBC) – Namur Research Institute of Life Science  
16 (Narilis), University of Namur, Namur, Belgium

17 <sup>6</sup> Present address: Essen University Hospital, Institute of Human Genetics, Genomeinformatics, Essen,  
18 Germany

19 <sup>7</sup> Present address: BioMed X Innovation Center, Heidelberg, Germany

20 <sup>8</sup> Institute of Experimental and Clinical Pharmacology and Toxicology, Faculty of Medicine, University  
21 of Freiburg, Freiburg, Germany

22 <sup>9</sup> Signalling Research Centres BIOS and CIBSS, University of Freiburg, Freiburg, Germany

23 <sup>10</sup> Internal Medicine III, University of Ulm, Ulm, Germany

24 <sup>11</sup> Center for Chronic Immunodeficiency, University Medical Center Freiburg and University of Freiburg,  
25 Freiburg, Germany

26 <sup>12</sup> Present address: Institute of Molecular Medicine, University Hospital RWTH Aachen, Aachen,  
27 Germany

28 \* These authors contributed equally

29 **Running title: EOMES<sup>+</sup> CD4<sup>+</sup> T-cells control CLL**

30

31 **Contact information for correspondence:**

32 Martina Seiffert

33 Molecular Genetics (B060), German Cancer Research Center (DKFZ)

34 Im Neuenheimer Feld 280, 69120 Heidelberg, Germany

35 Tel.: +49-6221-42 4586, Fax: +49-6221-42 4639

36 Email: [m.seiffert@dkfz.de](mailto:m.seiffert@dkfz.de)

37

38

39 **Keywords: CLL, CD4<sup>+</sup> T-cells, Eomes, IL-10, Exhaustion**

40

## 41 **Abstract**

42 The transcription factor Eomesodermin (EOMES) promotes IL-10 production of CD4<sup>+</sup> T-cells, which has  
43 been linked to immunosuppressive and cytotoxic activities. We detected EOMES-expressing CD4<sup>+</sup> T-  
44 cells in lymph node samples of patients with chronic lymphocytic leukemia (CLL) or diffuse large B-cell  
45 lymphoma. This was in line with an observed expansion of EOMES-positive CD4<sup>+</sup> T-cells in leukemic E $\mu$ -  
46 TCL1 mice, a well-established model of CLL, and upon adoptive transfer of TCL1 leukemia in mice.  
47 Transcriptome and flow cytometry analyses revealed that EOMES does not only drive the transcription  
48 of IL-10, but rather controls a unique differentiation program in CD4<sup>+</sup> T-cells. Moreover, EOMES was  
49 necessary for the accumulation of a specific CD4<sup>+</sup> T-cell subset that expresses IFN $\gamma$  and IL-10, as well  
50 as inhibitory receptors, like PD-1 and LAG3. T-cell transfer studies in leukopenic *Rag2*<sup>-/-</sup> mice showed  
51 that EOMES-deficient CD4<sup>+</sup> T-cells were inferior in controlling TCL1 leukemia development compared  
52 to wildtype T-cells, even though expansion of *Eomes*<sup>-/-</sup> CD4<sup>+</sup> T-cells was observed. We further showed  
53 that control of TCL1 leukemia was driven by IL-10 receptor-mediated signals, as *Il10rb*-deficient CD4<sup>+</sup>  
54 T-cells showed impaired anti-leukemia activity. Altogether, our data suggest that IL-10 producing PD-  
55 1<sup>+</sup> CD4<sup>+</sup> T-cells contribute to CLL control in an EOMES- and IL-10R-dependent manner.

## 56 **Introduction**

57 Despite abundant data characterizing CD4<sup>+</sup> T-cells and their subsets in B-cell Non-Hodgkin lymphoma  
58 (B-NHL) (1), and in particularly chronic lymphocytic leukemia (CLL) (2-6), their role in disease  
59 development and progression is poorly understood. Besides well-known T helper (Th) cell subsets (5),  
60 interleukin (IL)-10 producing, FOXP3<sup>-</sup> conventional CD4<sup>+</sup> T-cells, named type 1 regulatory (T<sub>R</sub>1) cells,  
61 are gaining attention in mouse models as well as patients harboring chronic inflammatory conditions  
62 such as inflammatory bowel disease (7-10). T<sub>R</sub>1 cells were initially described as IL-10-induced cells that  
63 produce IL-10 and IFN $\gamma$  and harbor cytotoxic activity, but also express several co-inhibitory receptors  
64 such as programmed cell death protein-1 (PD-1).

65 In B-NHL, an increased expression of PD-1 in blood-derived CD4<sup>+</sup> T-cells was reported for diffuse large  
66 B-cell lymphoma (DLBCL) (1, 11) as well as for CLL (4, 12, 13). In a preclinical study, a blocking antibody  
67 against the PD-1 ligand 1 (PD-L1) showed high activity in controlling CLL progression in the E $\mu$ -TCL1  
68 mouse model (14). These findings were the basis for clinical trials using immune checkpoint inhibitors  
69 targeting the PD-1/PD-L1 axis, which lead to varying but in general disappointing clinical results with  
70 none of the included CLL patients achieving remission in response to therapy and only a subgroup of  
71 patients, harboring a more aggressive Richter's transformation, benefitting from this treatment  
72 (NCT02332980) (15). It was hypothesized that the lack of clinical success of PD-1 blockade in CLL was  
73 due to the fact that tumor infiltrating T-cells in CLL have a lower expression of PD-1 in comparison to  
74 other B-NHL entities, including DLBCL (11). In DLBCL, PD-1 expression was shown to correlate with  
75 better survival (16, 17). However, immune checkpoint blockade resulted in an overall response rate of  
76 only about 10% in DLBCL patients (NCT02038933) (18).

77 Recently, the transcription factor Eomesodermin (EOMES) has been shown to promote IL-10  
78 production in T<sub>R</sub>1 cells (7-9). EOMES belongs to the T-box transcription factor family, which is  
79 expressed in many organs including the immune system (19). Redundantly with its paralogue T-BET,  
80 EOMES has been shown to promote IFN $\gamma$  production and cytotoxicity in natural killer (NK) cells (20-  
81 22), as well as in CD8<sup>+</sup> (21-23) and CD4<sup>+</sup> T-cells (7, 8, 21, 24, 25). EOMES has also a non-redundant role

82 in promoting maturation of the classical NK cell subset (26), and in the accumulation of central memory  
83 (22, 27) and exhausted, PD-1 expressing CD8<sup>+</sup> T-cells (28). Co-expression of PD-1 and EOMES of CD8<sup>+</sup>  
84 T-cells was confirmed by us in a mouse model of CLL (29).

85 In contrast to NK cells and CD8<sup>+</sup> T lymphocytes, very few CD4<sup>+</sup> T-cells express EOMES without  
86 immunological challenge (30). However, we and others have shown that EOMES can be upregulated  
87 in CD4<sup>+</sup> T-cells upon activation, which affects their differentiation into helper cell lineages. To this end,  
88 it has been shown that EOMES promotes IFN $\gamma$  expression by Th1 T-cells (31-33) and inhibits  
89 differentiation of Th17 (8, 33, 34) and FOXP3<sup>+</sup> regulatory T-cells (Treg) (30).

90 In cooperation with other factors like PR domain zinc finger protein 1 (BLIMP1), EOMES is a driver of  
91 IL-10 production in T<sub>R</sub>1 T-cells in mice (7) as well as humans (8). Whether EOMES only promotes *IL10*  
92 expression by T<sub>R</sub>1 cells or is a lineage-defining transcription factor is still unclear (35).

93 As investigations of EOMES and IL-10-producing CD4<sup>+</sup> T-cells in B-NHL, in particularly CLL and DLBCL,  
94 are scarce, we quantified EOMES-expressing CD4<sup>+</sup> T-cells in samples of CLL and DLBCL patients and the  
95 E $\mu$ -TCL1 mouse model of CLL. Using isolated cells of *Eomes-GFP* reporter mice, we characterized the  
96 transcriptional profile of EOMES<sup>+</sup> CD4<sup>+</sup> T-cells and elucidated the regulatory role of EOMES for this  
97 profile, identifying IL-10 as a main target in these cells that depends on EOMES. By performing co-  
98 transfer experiments of CD4<sup>+</sup> T-cells and E $\mu$ -TCL1 leukemia cells in immunodeficient mice, we further  
99 unravelled the importance of EOMES and IL-10 in CD4<sup>+</sup> T-cells in controlling leukemia development.

## 100 **Methods**

### 101 *Patient samples*

102 Patient samples were obtained after approval of study protocols by local ethics committees from the  
103 Department of Internal Medicine III of the University Clinic Ulm and the Department of Medicine V of  
104 the University Clinic Heidelberg according to the declaration of Helsinki, and after obtaining informed  
105 consent of patients. Patients met standard diagnosis criteria for CLL or DLBCL, respectively. Patient  
106 characteristics such as age, mutational state and Binet stage are provided in Supplementary Tables 1-  
107 3. Healthy, age-matched controls were obtained from Biomex GmbH (Heidelberg, Germany) after  
108 informed consent.

109

### 110 *Tumor models and adoptive CD4<sup>+</sup> T-cell transfer*

111 Adoptive transfer of mouse leukemic cells was performed by i.p. or i.v. transplantation of  $1-2 \times 10^7$  E $\mu$ -  
112 TCL1 splenocytes into C57BL/6 N or J wildtype (WT) animals. Splenocytes were enriched in CD19<sup>+</sup> cells  
113 using EasySep™ Mouse Pan-B Cell Isolation Kit (Stemcell Technologies, Vancouver, Canada) yielding a  
114 purity above 95% of CD5<sup>+</sup> CD19<sup>+</sup> cells. For CD4<sup>+</sup> co-transfer experiments, CD4<sup>+</sup> T-cells were isolated  
115 from splenocytes using EasySep™ Mouse CD4<sup>+</sup> T Cell Isolation Kit resulting in a purity of about 95%  
116 CD4<sup>+</sup> T-cells of total T-cells. *Rag2*<sup>-/-</sup> mice (DKFZ central animal facility) were i.v. transplanted with  $2 \times 10^5$   
117 CD4<sup>+</sup> T-cells or PBS as control. The following day,  $1 \times 10^6$  purified TCL1 leukemic cells were transferred  
118 i.v. into recipients.

119 Adoptive transfer of naïve CD4<sup>+</sup> T-cells was performed as previously described (30). In brief, *Rag2*<sup>-/-</sup>  
120 recipient mice received  $4 \times 10^5$  FACS-sorted CD4<sup>+</sup> CD45RB<sup>high</sup> T-cells by i.p. injection. Three weeks post  
121 transfer, mice were sacrificed and spleens analyzed.

122 All animal experiments were carried out according to institutional and governmental guidelines  
123 approved by the local authorities (Regierungspräsidium Karlsruhe, permit numbers: G36/14, G98/16,  
124 G123/14, and Regierungspräsidium Freiburg, permit number: 35-9185.81/G-13/73).

125

126 *Statistical analysis*

127 Samples of different groups were compared using non-parametric Mann-Whitney test. Comparison of  
128 matched samples was performed using Wilcoxon matched-pairs signed rank test. Values of  $p < 0.05$   
129 were considered statistically significant.

## 130 **Results**

### 131 **EOMES-expressing PD-1<sup>+</sup> CD4<sup>+</sup> T-cells are present in B-NHL patients**

132 CLL is associated with elevated numbers of CD4<sup>+</sup> and CD8<sup>+</sup> T-cells in blood (5, 36, 37), and increased  
133 expression of inhibitory molecules in T-cells has been reported in several studies for CLL (4, 13, 37) as  
134 well as DLBCL patients (1, 11). To explore the relevance of T-cell accumulation for disease progression,  
135 we first quantified PD-1 expressing CD4<sup>+</sup> T-cells in blood samples of patients with CLL or DLBCL, which  
136 represent an indolent and more aggressive B-NHL, respectively, in comparison to healthy controls (HC).  
137 Confirming previously published data, we detected higher percentages of PD-1-expressing CD4<sup>+</sup> T-cells  
138 in both patient groups in comparison to age-matched healthy controls (Figure 1A, C), as well as higher  
139 absolute numbers of these cells in CLL, but not DLBCL samples (Figure 1B, D).

140 Malignant B-cells in CLL (38) and DLBCL proliferate and expand in secondary lymphoid organs, which  
141 are also the sites of T-cell activation (39). Along this line, we have recently noted that the phenotype  
142 of peripheral blood T-cells and lymphoid organ-derived T-cells is distinct in CLL (37). Therefore, we  
143 analyzed lymph node (LN) samples of CLL and DLBCL patients and detected a substantial proportion of  
144 CD4<sup>+</sup> T-cells that express PD-1 in most samples (mean: 61% in CLL and 69% in DLBCL) with a high  
145 variability of the percentages ranging from 8 to 95% (Figure 1E; gating strategy: Supplementary Figure  
146 1). We further observed that approximately 20% of all CD4<sup>+</sup> T-cells in CLL and DLBCL LN samples co-  
147 expressed PD-1 and the transcription factor EOMES (Figure 1F).

148 Hence, EOMES-expressing PD-1<sup>+</sup> CD4<sup>+</sup> T-cells are present in CLL and DLBCL patients.

149

### 150 **Leukemia development in the E $\mu$ -TCL1 mouse model is associated with an accumulation of EOMES<sup>+</sup>** 151 **PD-1<sup>+</sup> CD4<sup>+</sup> T-cells**

152 To further investigate the role of EOMES-expressing CD4<sup>+</sup> T-cells in B-NHL, we analyzed the presence  
153 of these cells in the E $\mu$ -TCL1 (TCL1) mouse model of CLL. Interestingly, analysis of age- and sex-matched  
154 leukemic TCL1 mice and wildtype (WT) littermates revealed a higher abundance of PD-1<sup>+</sup> CD4<sup>+</sup> T-cells  
155 in the spleen of TCL1 mice (Figure 2A, Gating strategy Supplementary Figure 2A). Of note, the majority



156 of these PD-1<sup>+</sup> cells also expressed EOMES (Figure 2B) as well as the inhibitory receptor LAG3  
157 (Supplementary Figure 2B). To overcome long latency of CLL development in this mouse model,  
158 leukemic splenocytes of TCL1 mice were retrieved and adoptively transferred into syngeneic WT mice  
159 (TCL1 AT), as previously described (6, 37, 40). Upon leukemia development in the TCL1 AT model, we  
160 observed an accumulation of antigen-experienced CD4<sup>+</sup> T-cells (Supplementary Figure 2C) that show  
161 signs of activation as measured by CD69 (Supplementary Figure 2D). Moreover, a higher frequency of  
162 PD-1-expressing CD4<sup>+</sup> T-cells (Figure 2C) was detected, which showed a high co-expression rate of  
163 EOMES (Figure 2D) as well as LAG3 (Supplementary Figure 2E). Interestingly, the frequency of EOMES<sup>+</sup>  
164 PD-1<sup>+</sup> CD4<sup>+</sup> T-cells was higher in aging E $\mu$ -TCL1 mice compared to the younger mice of the TCL1 AT  
165 (Figure 2B, D), which is in line with our previous data showing that EOMES<sup>+</sup> CD4<sup>+</sup> T-cells accumulate  
166 with age (30).

167 Altogether, CLL development in the E $\mu$ -TCL1 and TCL1 AT models is associated with an enrichment of  
168 EOMES-expressing PD-1<sup>+</sup> CD4<sup>+</sup> T-cells and therefore, these models are useful tools to investigate the  
169 role of this cell type in CLL.

170

### 171 **EOMES is indispensable for CD4<sup>+</sup> T-cell mediated control of leukemia development in TCL1 AT mice**

172 In order to decipher the role of EOMES<sup>+</sup> PD-1<sup>+</sup> CD4<sup>+</sup> T-cells in CLL development, we transferred CD4<sup>+</sup> T-  
173 cells into *Rag2*<sup>-/-</sup> mice, which lack mature B- and T-cells (41). Subsequently, the mice were transplanted  
174 with TCL1 leukemia cells, as previously described (6, 37, 40). We detected an expansion of CD4<sup>+</sup> T-cells  
175 in *Rag2*<sup>-/-</sup> mice, which was similar with or without leukemia cell transfer (Supplementary Figure 3A).  
176 We further observed that CD4<sup>+</sup> T-cells controlled leukemia progression, as indicated by lower CD5<sup>+</sup>  
177 CD19<sup>+</sup> CLL cell counts in blood (Figure 3A) as well as lower weight and leukemia cell content per spleen  
178 compared to mice without T-cell transfer (Supplementary Figure 3B-C). Of interest, CD4<sup>+</sup> T-cells from  
179 leukemia-bearing *Rag2*<sup>-/-</sup> mice showed a higher frequency of PD-1-positive cells (Supplementary Figure  
180 3D) as well as EOMES<sup>+</sup> PD-1<sup>+</sup> CD4<sup>+</sup> T-cells (Supplementary Figure 3E) in comparison to non-leukemic  
181 control mice.

182 To analyze the role of EOMES in controlling CLL progression, we next transplanted wildtype (WT) or  
183 *Eomes* knock-out (*Eomes*<sup>-/-</sup>) CD4<sup>+</sup> T-cells, expressing fluorescent reporter proteins for *Foxp3* (RFP) and  
184 *Il10* (GFP), into *Rag2*<sup>-/-</sup> mice followed by adoptive transfer of TCL1 leukemia cells. Analysis of CLL  
185 progression in these mice showed that *Eomes*<sup>-/-</sup> CD4<sup>+</sup> T-cells failed to control CLL development as  
186 evidenced by higher numbers of CD5<sup>+</sup> CD19<sup>+</sup> CLL cells in blood (Figure 3A) as well as higher spleen  
187 weights (Figure 3B). We further monitored CD4<sup>+</sup> T-cell expansion in these mice over time and observed  
188 higher T-cell numbers in recipient mice of *Eomes*<sup>-/-</sup> CD4<sup>+</sup> T-cells compared to WT T-cells (Figure 3C).  
189 However, in the spleen of these animals, a lower absolute number of CD4<sup>+</sup> T-cells per spleen (Figure  
190 3D) as well as per CLL cell (Figure 3E) was noted in the *Eomes*<sup>-/-</sup> in comparison to the WT group. In line  
191 with this, *Eomes*<sup>-/-</sup> T-cells in the spleen showed a lower proliferation rate based on KI-67 staining  
192 compared to WT T-cells (Figure 3F).

193 To sum up, CD4<sup>+</sup> T-cells lacking EOMES show an impaired control of TCL1 leukemia progression in *Rag2*<sup>-/-</sup>  
194 *Eomes*<sup>-/-</sup> mice in comparison to EOMES-proficient T-cells. Although *Eomes*<sup>-/-</sup> CD4<sup>+</sup> T-cells are more highly  
195 abundant in blood compared to WT T-cells, they proliferate less and are significantly lower in numbers  
196 in the spleen of these mice, which might explain the reduced leukemia control in the *Eomes*<sup>-/-</sup> group.

197

### 198 **EOMES positive CD4<sup>+</sup> T-cells express inhibitory receptors**

199 To gain mechanistic insights into how EOMES regulates CD4<sup>+</sup> T-cell differentiation and function, we  
200 performed comparative transcriptome analyses of GFP<sup>+</sup> EOMES<sup>+</sup> and GFP<sup>-</sup> EOMES<sup>-</sup> CD4<sup>+</sup> T-cells from  
201 *Eomes-GFP* reporter mice (*Eomes*<sup>+/GFP</sup>) (42). Moreover, we obtained gene expression data of GFP<sup>+</sup>  
202 versus GFP<sup>-</sup> CD4<sup>+</sup> T-cells isolated from *Eomes*<sup>ΔT/GFP</sup> knock-out mice, in which one *Eomes* allele is  
203 disrupted by *GFP* insertion and the other allele is deleted using a T-cell-specific *cre* recombinase.  
204 Deletion of the floxed exons of *Eomes* in these mice was confirmed by RNA sequencing (Supplementary  
205 Figure 4). To expand EOMES-expressing cells for these analyses, we transferred naïve CD25<sup>-</sup> CD45RB<sup>high</sup>  
206 CD4<sup>+</sup> T-cells isolated from *Eomes*<sup>+/GFP</sup> reporter or *Eomes*<sup>ΔT/GFP</sup> knock-out donor animals into *Rag2*<sup>-/-</sup> mice  
207 as previously described (30), and three weeks later, sorted GFP<sup>+</sup> and GFP<sup>-</sup> CD4<sup>+</sup> T-cell populations from

208 both *Eomes*<sup>+/*GFP*</sup> and *Eomes* <sup>$\Delta$ T/*GFP*</sup> donor mice for RNA sequencing (see Figure 4A for experimental  
209 setup).

210 Comparing EOMES<sup>+</sup> versus EOMES<sup>-</sup> T-cells from *Eomes*<sup>+/*GFP*</sup> reporter mice (Figure 4A, comparison 1),  
211 we identified a signature transcriptome of EOMES<sup>+</sup> CD4<sup>+</sup> T-cells with 1,395 differentially expressed  
212 genes (Figure 4B; Supplementary Figure 5A; Supplementary Table 4). In contrast, only 77 genes (Figure  
213 4B; Supplementary Figure 5A; Supplementary Table 4) were dependent on the presence of EOMES, as  
214 they were differentially expressed between EOMES<sup>+</sup> GFP<sup>+</sup> cells from *Eomes*<sup>+/*GFP*</sup> reporter mice and  
215 EOMES<sup>-</sup> GFP<sup>+</sup> cells from *Eomes* <sup>$\Delta$ T/*GFP*</sup> knock-out mice (Figure 4A, comparison 2). Intersecting these two  
216 sets of differentially expressed genes (Figure 4A, comparison 1, 2) we identified a small number of 37  
217 genes (Supplementary Figure 5A; Supplementary Table 4) as being dependent on the transcriptional  
218 activity of EOMES. While this small difference can be partially attributed to a high variability of data  
219 among the three samples of *Eomes* knock-out origin, a heatmap of the differentially expressed genes  
220 in the two comparisons shows that most of the transcriptional signature of *Eomes*<sup>+/*GFP*</sup> CD4<sup>+</sup> T-cells is  
221 not dependent on EOMES (Figure 4B).

222 As previously shown (30), both EOMES<sup>+</sup> and EOMES<sup>-</sup> CD4<sup>+</sup> T-cells expressed Th1-like transcripts, such  
223 as *Tbx21*, *Ifng* and *Cxcr3* (Supplementary Figure 5B). In line with the redundant functions of EOMES  
224 and T-BET in Th1 differentiation (32), the Th1-like profile was EOMES-independent as these genes were  
225 also expressed in GFP<sup>+</sup> CD4<sup>+</sup> T-cells of *Eomes* <sup>$\Delta$ T/*GFP*</sup> knock-out mice (Supplementary Figure 5B). Neither  
226 Th2-, Th17-, or other Th-, nor Treg-associated genes were expressed by GFP<sup>+</sup> cells of *Eomes*<sup>+/*GFP*</sup>  
227 reporter or *Eomes* <sup>$\Delta$ T/*GFP*</sup> knock-out mice (Supplementary Figure 5B), respectively, suggesting that these  
228 CD4<sup>+</sup> T-cell fates are not regulated by EOMES.

229 Gene set enrichment analysis (GSEA) identified similarities of the transcriptional profile of EOMES<sup>+</sup>  
230 CD4<sup>+</sup> T-cells with human T<sub>R</sub>1 cells (8) (Supplementary Figure 5C) which is indicative for shared  
231 functional properties of these two cell populations.

232

233 Interestingly, the identified signature of EOMES<sup>+</sup> CD4<sup>+</sup> T-cells contained several transcripts of co-  
234 inhibitory receptors, like LAG3, PD-1 (encoded by the *Pdcd1* gene), and TIGIT which were upregulated  
235 in EOMES<sup>+</sup> CD4<sup>+</sup> T-cells (Figure 4C), as similarly reported for exhausted CD4<sup>+</sup> T-cells in chronic viral  
236 infections (43). We further validated the increased expression of PD-1 and LAG3 in EOMES<sup>+</sup> versus  
237 EOMES<sup>-</sup> CD4<sup>+</sup> T-cells by flow cytometry (Figure 4D). Of note, also EOMES<sup>-</sup> CD4<sup>+</sup> T-cells expressed these  
238 inhibitory receptors, albeit to a significantly lower frequency of cells.

239 As EOMES<sup>+</sup> CD4<sup>+</sup> T-cells showed a low gene expression of *Cd44* (Figure 4C), we investigated whether  
240 EOMES-expressing CD4<sup>+</sup> T-cells can be defined by the expression of PD-1 and low expression of CD44  
241 (CD44<sup>lo</sup>). Adoptive transfer of WT or *Eomes*<sup>-/-</sup> CD4<sup>+</sup> T-cells in *Rag2*<sup>-/-</sup> mice revealed a lower frequency  
242 of the PD-1<sup>+</sup> CD44<sup>lo</sup> CD4<sup>+</sup> T-cell population in the *Eomes* knock-out setting (Figure 4E). This finding was  
243 reproduced after co-transplantation of WT and *Eomes*<sup>-/-</sup> CD4<sup>+</sup> T-cells into the same recipients (Figure  
244 4E). Whereas PD-1<sup>+</sup> CD44<sup>lo</sup> was suitable to identify EOMES<sup>+</sup> CD4<sup>+</sup> T-cells in T-cell transfer experiments  
245 in *Rag2*<sup>-/-</sup> mice, this population was not distinct in aged mice (Supplementary Figure 5D), suggesting  
246 that this marker combination is not suitable to identify EOMES<sup>+</sup> CD4<sup>+</sup> T-cells under more physiological  
247 conditions.

248 In summary, EOMES drives the expression of a small gene signature in CD4<sup>+</sup> T-cells, which includes PD-  
249 1 and several other co-inhibitory receptors.

250

### 251 **EOMES drives IL-10 production and IL-10 receptor expression in CD4<sup>+</sup> T-cells**

252 In addition to the high expression of inhibitory receptors by EOMES<sup>+</sup> CD4<sup>+</sup> T-cells, we identified three  
253 cytokines among the upregulated genes (*Il10*, *Il1b*, *Tnfsf13b*), of which *Il10* showed an EOMES-  
254 dependent expression (Figure 5A; Supplementary Table 4), which is in agreement with previous reports  
255 (7, 8). We further observed a significantly higher expression of the IL-10 receptor alpha and beta chain  
256 genes, *Il10ra* and *Il10rb*, in GFP<sup>+</sup> versus GFP<sup>-</sup> CD4<sup>+</sup> T-cells of *Eomes*<sup>+/GFP</sup> reporter mice (Figure 4A,  
257 comparison 1), which was less pronounced in the *Eomes*<sup>ΔT/GFP</sup> knock-out mouse line (Figure 5A),  
258 suggesting that expression of these genes might be EOMES-dependent.

259 Transplantation of T-cells into *Rag2*<sup>-/-</sup> mice, confirmed that the majority of IL-10-producing CD4<sup>+</sup> T-cells  
260 co-express EOMES (Figure 5B). Importantly, most IL-10-producing cells also co-expressed IFN $\gamma$  (Figure  
261 5C) which was dependent on EOMES but not on microenvironmental factors, as similar results were  
262 seen after transfer of WT and *Eomes*<sup>-/-</sup> CD4<sup>+</sup> T-cells in separate and the same *Rag2*<sup>-/-</sup> hosts (Figure 5C,  
263 D).

264 IL-10 has been shown to exert tumor-supporting (44) as well as anti-tumoral functions (45). To analyze  
265 whether IL-10 was also produced by PD-1<sup>+</sup> CD4<sup>+</sup> T-cells in the setting of TCL1 leukemia, we  
266 subsequently analyzed IL-10 and IFN $\gamma$  production in the TCL1 AT mouse model. Indeed, we observed  
267 an increased percentage of CD4<sup>+</sup> T-cells that produce IL-10 after transfer of TCL1 leukemia which was  
268 considerably higher compared to unchallenged mice (Supplementary Figure 6). In addition, we  
269 confirmed a higher production of IFN $\gamma$  of CD4<sup>+</sup> T-cells in this transfer model, as previously described  
270 by us (5). Transfer of CD4<sup>+</sup> T-cells into *Rag2*<sup>-/-</sup> mice showed that lack of EOMES in CD4<sup>+</sup> T-cells ablated  
271 the expression of IL-10 also in the TCL1 leukemia setting (Figure 5E) and caused a reduced production  
272 of IFN $\gamma$  in PD-1<sup>+</sup> CD4<sup>+</sup> T-cells after *ex vivo* stimulation (Figure 5F).

273 In sum, these results confirm that EOMES drives IL-10 production in CD4<sup>+</sup> T-cells, and show that CLL  
274 development strongly enhances IL-10 and IFN $\gamma$  production in CD4<sup>+</sup> T-cells.

275

## 276 **IL-10R signaling maintains moderate EOMES expression in CD4<sup>+</sup> T-cells and allows them to control** 277 **CLL**

278 Since EOMES<sup>+</sup> CD4<sup>+</sup> T-cells showed increased expression of IL-10 receptor genes (*Il10ra* and *Il10rb*,  
279 Figure 5A), we investigated the role of IL-10R-mediated signaling in EOMES<sup>+</sup> PD-1<sup>+</sup> CD4<sup>+</sup> T-cells and its  
280 impact on control of TCL1 leukemia. Either *Il10rb*<sup>+/+</sup> (WT) or *Il10rb*<sup>-/-</sup> CD4<sup>+</sup> T-cells were injected into  
281 *Rag2*<sup>-/-</sup> mice followed by transplantation of TCL1 leukemia. Of interest, *Il10rb*-deficient CD4<sup>+</sup> T-cells  
282 showed a reduced control of CLL as measured by CD5<sup>+</sup> CD19<sup>+</sup> CLL counts in blood over time (Figure  
283 6A). Accordingly, mice that received *Il10rb*<sup>-/-</sup> T-cells had a higher spleen weight in comparison to control  
284 mice receiving WT T-cells (Figure 6B). To evaluate whether a reduced expansion of *Il10rb*<sup>-/-</sup> CD4<sup>+</sup> T-cells

285 contributes to the diminished CLL control, T-cell counts were monitored in blood over time. Three and  
286 four weeks after transfer of leukemic cells, a higher number of *Il10Rb*<sup>-/-</sup> versus WT CD4<sup>+</sup> T-cells was  
287 seen in blood (Figure 6C). CD4<sup>+</sup> T-cell counts in spleen showed a trend towards a higher number of  
288 *Il10rb*<sup>-/-</sup> CD4<sup>+</sup> T-cells compared to WT T-cells per spleen (Figure 6D), which is likely a reflection of the  
289 bigger spleen sizes in the *Il10rb*<sup>-/-</sup> group, as the number of CD4<sup>+</sup> T-cells per CLL cell was reduced in these  
290 mice in comparison to the WT group (Figure 6E). Nevertheless, proliferation of CD4<sup>+</sup> T-cells, as  
291 measured by KI-67, did not differ between the two groups (Figure 6F). Hence, IL-10R-mediated  
292 signaling in CD4<sup>+</sup> T-cells is required for their efficient control of CLL development which is not primarily  
293 due to an impact on T-cell expansion.

294 IL-10R $\alpha$  signaling was shown to be dispensable for the differentiation of T<sub>H</sub>1 T-cells, but not for the  
295 function of this cell type (46). Similarly, we investigated the effect of *Il10Rb*<sup>-/-</sup> on EOMES<sup>+</sup> PD-1<sup>+</sup> CD4<sup>+</sup>  
296 T-cells. Intriguingly, loss of *Il10rb* signaling in CD4<sup>+</sup> T-cells resulted in a higher percentage of PD-1-  
297 expressing cells (Figure 6G). Moreover, the expression level of PD-1 was significantly higher in *Il10rb*<sup>-/-</sup>  
298 CD4<sup>+</sup> T-cells compared to WT T-cells (Figure 6H), with almost all *Il10rb*<sup>-/-</sup> CD4<sup>+</sup> T-cells expressing high  
299 levels of PD-1, whereas WT CD4<sup>+</sup> T-cells showed similar percentages of cells with high or intermediate  
300 PD-1 expression (Figure 6I). Furthermore, *Il10rb*<sup>-/-</sup> CD4<sup>+</sup> T-cells showed a higher frequency of EOMES<sup>+</sup>  
301 PD-1<sup>+</sup> CD4<sup>+</sup> T-cells than WT T-cells (Figure 6J). Finally, *Il10rb* deficiency resulted in a reduced capacity of  
302 these T-cells to produce IFN $\gamma$  after *ex vivo* stimulation (Figure 6K).

303 Taken together, our data suggests that EOMES regulates IL10R signaling in CD4<sup>+</sup> T-cells and that EOMES  
304 and IL10R are necessary to efficiently limit CLL progression.

## 305 Discussion

306 An altered frequency of CD4<sup>+</sup> T-cell subsets in B-NHL patients is widely described (1, 3, 5, 6). Among  
307 these subsets, particularly IL-10-expressing Tregs were of interest during investigations, as they are  
308 thought to mediate immunosuppressive functions and thus contribute to disease progression (6). By  
309 analyzing blood samples of CLL and DLBCL patients, we observed a higher proportion of PD-1-  
310 expressing CD4<sup>+</sup> T-cells in both patient groups compared to healthy controls thus confirming published  
311 data (1, 4, 11-13). Moreover, we noted a population of EOMES<sup>+</sup> PD-1<sup>+</sup> CD4<sup>+</sup> T-cells in LN samples of CLL  
312 as well as DLBCL patients. In the follicles of secondary lymphoid organs, tight interactions of T- and  
313 malignant B-cells take place, which lead to activation and, in case of persistent exposure to antigens,  
314 to T-cell exhaustion (37, 47) which might contribute to the observed phenotype of T-cells in CLL and  
315 DLBCL LNs.

316 CD4<sup>+</sup> T-cells expressing high amounts of the degranulation marker protein CD107a and effector  
317 molecules like perforines and granzymes were found in blood of B-NHL patients (48-50). Moreover,  
318 CD4<sup>+</sup> T-cells that were co-cultured with autologous B-cells, either from CLL patients or healthy controls,  
319 had the capacity to kill autologous B-cells (48). Similar to our approach, co-transfer of naïve, tumor-  
320 specific CD4<sup>+</sup> T-cells in a transplantation mouse model of B16 melanoma significantly prolonged  
321 survival of mice, which was further enhanced by anti-CTLA-4 treatment (51). A cytotoxic activity of  
322 these CD4<sup>+</sup> T-cells was suggested as they acquired an effector phenotype with high cytokine  
323 production (51). Similar results were obtained in *Rag2*<sup>-/-</sup> mice, indicating that CD4<sup>+</sup> T-cell-mediated  
324 tumor control was independent of endogenous B- and T-cells (51), which is in line with our data in the  
325 TCL1 AT mouse model of CLL.

326 In our study, EOMES was shown to be essential for the control of leukemia progression. EOMES is a  
327 transcription factor that is crucial in memory formation of CD8<sup>+</sup> T-cells (27), but not necessary to induce  
328 their effector function during viral infections (21). In contrast, high EOMES expression was shown to  
329 result in terminal differentiation of CD8<sup>+</sup> T-cells (28). Here, we provide evidence that EOMES is  
330 indispensable for CLL control by CD4<sup>+</sup> T-cells most likely due to its role in their effector function, which

331 is in line with reports demonstrating EOMES-dependency for granzyme B production of cytotoxic CD4<sup>+</sup>  
332 T-cells (24, 25, 52).

333 Besides its role in regulating cytotoxic activity of CD4<sup>+</sup> T-cells, the importance of EOMES in the  
334 generation of T<sub>R</sub>1 T-cells was recently shown (7, 8). T<sub>R</sub>1 T-cells do not constitutively express FOXP3,  
335 produce the immunosuppressive cytokine IL-10, express co-inhibitory receptors such as PD-1, and are  
336 able to suppress the function of effector immune cells (10). The expression of IL-10 and other cytokines  
337 and their receptors, in combination with increased expression levels of inhibitory receptors are shared  
338 features of CD4<sup>+</sup> EOMES<sup>+</sup> T-cells in B-NHL and T<sub>R</sub>1 cells.

339 In line with published data demonstrating that EOMES regulates IL-10 expression (7, 8, 53), our data  
340 in the TCL1 mouse model of CLL show that IL-10 production of CD4<sup>+</sup> T-cells is dependent on EOMES. In  
341 addition, IL-10 receptor expression is higher in EOMES-positive than -negative CD4<sup>+</sup> T-cells, which is in  
342 accordance with data of CD8<sup>+</sup> T-cells (53). Since IL-10-driven signaling via *p38 MAPK* was shown to be  
343 important to maintain IL-10 production in T<sub>R</sub>1 CD4<sup>+</sup> T-cells (46), we investigated the role of IL-10R  
344 signaling in CD4<sup>+</sup> T-cells. Intriguingly, *Il10rb*<sup>-/-</sup> CD4<sup>+</sup> T-cells showed a reduced CLL control alongside with  
345 a high expression of PD-1 as well as EOMES. This increase in PD-1 and EOMES expression was  
346 accompanied by a reduction in IFN $\gamma$  production, suggesting that IL-10R signaling is additionally involved  
347 in the regulation of the effector activity of CD4<sup>+</sup> T-cells. This is in line with published results for CD8<sup>+</sup> T-  
348 cells, showing that overexpression of EOMES resulted in an increased expression of exhaustion  
349 molecules such as *CD244*, *Havcr2* as well as *Il10ra*, implicating a role for IL-10-mediated signaling in  
350 regulating T-cell exhaustion (54). Moreover, during murine chronic viral infections, CD4<sup>+</sup> T-cells  
351 upregulate EOMES as well as inhibitory receptors that are associated with T-cell exhaustion (43).  
352 Studies in such infection models as well as from murine and human cancer showed that the expression  
353 level of PD-1 in CD8<sup>+</sup> T-cells determines their state of exhaustion and potential for reinvigoration by  
354 PD-1 blockade (55). Very similar to these data, we detected CD4<sup>+</sup> T-cells with intermediate or high PD-  
355 1 expression in the TCL1 mouse model. Interestingly, loss of IL-10R signaling in these cells resulted in



356 an accumulation of PD-1<sup>hi</sup> cells with reduced IFN $\gamma$  production and impaired CLL control. This suggests  
357 that IL-10-mediated signals are important to maintain CD4<sup>+</sup> T-cell effector function.

358 Genome-wide association studies (GWAS) showed that single nucleotide polymorphisms (SNPs) in  
359 proximity of the *EOMES* gene, which is located at chromosome 3p24.1, are associated with a higher  
360 risk of CLL (rs9880772) (56, 57), DLBCL (rs6773363) (58) as well as Hodgkin's Lymphoma (rs3806624)  
361 (59). The higher likelihood of B-NHL in individuals carrying these SNPs was thought to be caused by a  
362 deregulated immune function, which could at least partially be explained by the reduced control of  
363 CLL development in the absence of CD8<sup>+</sup> T-cells. Alongside, preclinical data in mouse models (60), as  
364 well as data of a phase 1 basket trial (NCT02009449) using pegylated IL-10 for treatment of solid cancer  
365 demonstrated that IL-10 helps to maintain CD8<sup>+</sup> T-cell mediated tumor control and improves patients'  
366 responses to PD-1 blockade (45).

367 In summary, this report highlights the presence of EOMES-expressing PD-1<sup>+</sup> CD4<sup>+</sup> T-cells in LNs of CLL  
368 and DLBCL patients as well as in the TCL1 mouse model of CLL. Our data in this animal model clearly  
369 show that EOMES is crucial for CD4<sup>+</sup> T-cell-mediated disease control. As EOMES regulates IL-10  
370 production, we further demonstrate a role for IL-10-mediated signaling in EOMES-expressing CD4<sup>+</sup> T-  
371 cells, which mediate effector activity and thus control of leukemia.

372

373 **Acknowledgments**

374 This study was supported by the German Research Foundation project EV-RNA (SE 2331/2-1) and by  
375 the German José Carreras Foundation (grant 13R/2018) to MS. PMR was supported by the German  
376 Cancer Aid grant number 112069. EL and AI were supported by Bundesministerium für Bildung und  
377 Forschung (grant BMBF 01 EO 1303) and EL, FK, MK and AI were supported by the Max Planck Society.  
378 SJA was supported by the German Research Foundation (AR 732/2-1, AR 732/3-1), project A03 of SFB  
379 850 (project ID 89986987) and Germany's Excellence Strategy (CIBSS – EXC-2189 – Project ID  
380 390939984). St.St. was supported by DFG SFB1074 subproject B1.

381

382 **Author contributions**

383 PMR, LLC and EL designed the study, performed experiments, analyzed and interpreted data, prepared  
384 figures, and wrote the manuscript. TR, MB, CS, MK and ACG performed experiments. FK performed  
385 bioinformatics analysis. LS, StSt and SD provided clinical samples and information. SJA provided mice  
386 and advised the study. PL critically advised the study and reviewed the manuscript. AI and MS designed  
387 and supervised the study, interpreted data, and wrote the manuscript.

388

389 **Competing interests**

390 The authors declare that they have no competing interests.

391 **References:**

- 392 1. Zhang L, Du H, Xiao TW, Liu JZ, Liu GZ, Wang JX, et al. Prognostic value of PD-1 and TIM-3 on  
393 CD3+ T cells from diffuse large B-cell lymphoma. *Biomed Pharmacother.* 2015;75:83-7.
- 394 2. Kocher T, Asslaber D, Zaborsky N, Flenady S, Denk U, Reinthaler P, et al. CD4+ T cells, but not  
395 non-classical monocytes, are dispensable for the development of chronic lymphocytic leukemia in  
396 the TCL1-tg murine model. *Leukemia.* 2016;30(6):1409-13.
- 397 3. Bagnara D, Kaufman MS, Calissano C, Marsilio S, Patten PE, Simone R, et al. A novel adoptive  
398 transfer model of chronic lymphocytic leukemia suggests a key role for T lymphocytes in the disease.  
399 *Blood.* 2011;117(20):5463-72.
- 400 4. Brusa D, Serra S, Coscia M, Rossi D, D'Arena G, Laurenti L, et al. The PD-1/PD-L1 axis  
401 contributes to T-cell dysfunction in chronic lymphocytic leukemia. *Haematologica.* 2013;98(6):953-  
402 63.
- 403 5. Roessner PM, Hanna BS, Ozturk S, Schulz R, Llao Cid L, Yazdanparast H, et al. TBET-expressing  
404 Th1 CD4(+) T cells accumulate in chronic lymphocytic leukaemia without affecting disease  
405 progression in Emicro-TCL1 mice. *British journal of haematology.* 2019.
- 406 6. Hanna BS, Roessner PM, Scheffold A, Jebaraj BMC, Demerdash Y, Ozturk S, et al. PI3Kdelta  
407 inhibition modulates regulatory and effector T-cell differentiation and function in chronic  
408 lymphocytic leukemia. *Leukemia.* 2019;33(6):1427-38.
- 409 7. Zhang P, Lee JS, Gartlan KH, Schuster IS, Comerford I, Varelias A, et al. Eomesodermin  
410 promotes the development of type 1 regulatory T (TR1) cells. *Sci Immunol.* 2017;2(10).
- 411 8. Gruarin P, Maglie S, De Simone M, Haringer B, Vasco C, Ranzani V, et al. Eomesodermin  
412 controls a unique differentiation program in human IL-10 and IFN-gamma coproducing regulatory T  
413 cells. *European journal of immunology.* 2019;49(1):96-111.
- 414 9. Brockmann L, Soukou S, Steglich B, Czarnewski P, Zhao L, Wende S, et al. Molecular and  
415 functional heterogeneity of IL-10-producing CD4(+) T cells. *Nat Commun.* 2018;9(1):5457.
- 416 10. Roncarolo MG, Gregori S, Bacchetta R, Battaglia M, Gagliani N. The Biology of T Regulatory  
417 Type 1 Cells and Their Therapeutic Application in Immune-Mediated Diseases. *Immunity.*  
418 2018;49(6):1004-19.
- 419 11. Muenst S, Hoeller S, Willi N, Dirnhofera S, Tzankov A. Diagnostic and prognostic utility of PD-  
420 1 in B cell lymphomas. *Disease markers.* 2010;29(1):47-53.
- 421 12. Palma M, Gentilcore G, Heimersson K, Mozaffari F, Nasman-Glaser B, Young E, et al. T cells in  
422 chronic lymphocytic leukemia display dysregulated expression of immune checkpoints and activation  
423 markers. *Haematologica.* 2017;102(3):562-72.
- 424 13. Riches JC, Davies JK, McClanahan F, Fatah R, Iqbal S, Agrawal S, et al. T cells from CLL patients  
425 exhibit features of T-cell exhaustion but retain capacity for cytokine production. *Blood.*  
426 2013;121(9):1612-21.
- 427 14. McClanahan F, Hanna B, Miller S, Clear AJ, Lichter P, Gribben JG, et al. PD-L1 checkpoint  
428 blockade prevents immune dysfunction and leukemia development in a mouse model of chronic  
429 lymphocytic leukemia. *Blood.* 2015;126(2):203-11.
- 430 15. Ding W, LaPlant BR, Call TG, Parikh SA, Leis JF, He R, et al. Pembrolizumab in patients with CLL  
431 and Richter transformation or with relapsed CLL. *Blood.* 2017;129(26):3419-27.
- 432 16. Fang X, Xiu B, Yang Z, Qiu W, Zhang L, Zhang S, et al. The expression and clinical relevance of  
433 PD-1, PD-L1, and TP63 in patients with diffuse large B-cell lymphoma. *Medicine (Baltimore).*  
434 2017;96(15):e6398.
- 435 17. Ahearne MJ, Bhuller K, Hew R, Ibrahim H, Naresh K, Wagner SD. Expression of PD-1 (CD279)  
436 and FoxP3 in diffuse large B-cell lymphoma. *Virchows Arch.* 2014;465(3):351-8.
- 437 18. Zhang J, Medeiros LJ, Young KH. Cancer Immunotherapy in Diffuse Large B-Cell Lymphoma.  
438 *Frontiers in oncology.* 2018;8:351.
- 439 19. Naiche LA, Harrelson Z, Kelly RG, Papaioannou VE. T-box genes in vertebrate development.  
440 *Annu Rev Genet.* 2005;39:219-39.

- 441 20. Cruz-Guilloty F, Pipkin ME, Djuretic IM, Levanon D, Lotem J, Lichtenheld MG, et al. Runx3 and  
442 T-box proteins cooperate to establish the transcriptional program of effector CTLs. *The Journal of*  
443 *experimental medicine*. 2009;206(1):51-9.
- 444 21. Pearce EL, Mullen AC, Martins GA, Krawczyk CM, Hutchins AS, Zediak VP, et al. Control of  
445 effector CD8+ T cell function by the transcription factor Eomesodermin. *Science*.  
446 2003;302(5647):1041-3.
- 447 22. Intlekofer AM, Takemoto N, Wherry EJ, Longworth SA, Northrup JT, Palanivel VR, et al.  
448 Effector and memory CD8+ T cell fate coupled by T-bet and eomesodermin. *Nat Immunol*.  
449 2005;6(12):1236-44.
- 450 23. Hegel JK, Knieke K, Kolar P, Reiner SL, Brunner-Weinzierl MC. CD152 (CTLA-4) regulates  
451 effector functions of CD8+ T lymphocytes by repressing Eomesodermin. *European journal of*  
452 *immunology*. 2009;39(3):883-93.
- 453 24. Qui HZ, Hagymasi AT, Bandyopadhyay S, St Rose MC, Ramanarasimhaiah R, Menoret A, et al.  
454 CD134 plus CD137 dual costimulation induces Eomesodermin in CD4 T cells to program cytotoxic Th1  
455 differentiation. *Journal of immunology (Baltimore, Md : 1950)*. 2011;187(7):3555-64.
- 456 25. Curran MA, Geiger TL, Montalvo W, Kim M, Reiner SL, Al-Shamkhani A, et al. Systemic 4-1BB  
457 activation induces a novel T cell phenotype driven by high expression of Eomesodermin. *The Journal*  
458 *of experimental medicine*. 2013;210(4):743-55.
- 459 26. Gordon SM, Chaix J, Rupp LJ, Wu J, Madera S, Sun JC, et al. The transcription factors T-bet  
460 and Eomes control key checkpoints of natural killer cell maturation. *Immunity*. 2012;36(1):55-67.
- 461 27. Banerjee A, Gordon SM, Intlekofer AM, Paley MA, Mooney EC, Lindsten T, et al. Cutting edge:  
462 The transcription factor eomesodermin enables CD8+ T cells to compete for the memory cell niche.  
463 *Journal of immunology (Baltimore, Md : 1950)*. 2010;185(9):4988-92.
- 464 28. Paley MA, Kroy DC, Odorizzi PM, Johnnidis JB, Dolfi DV, Barnett BE, et al. Progenitor and  
465 terminal subsets of CD8+ T cells cooperate to contain chronic viral infection. *Science*.  
466 2012;338(6111):1220-5.
- 467 29. Liao Cid L, Hanna BS, Iskar M, Roessner PM, Ozturk S, Lichter P, et al. CD8(+) T-cells of CLL-  
468 bearing mice acquire a transcriptional program of T-cell activation and exhaustion. *Leuk Lymphoma*.  
469 2020;61(2):351-6.
- 470 30. Lupar E, Brack M, Garnier L, Laffont S, Rauch KS, Schachtrup K, et al. Eomesodermin  
471 Expression in CD4+ T Cells Restricts Peripheral Foxp3 Induction. *Journal of immunology (Baltimore,*  
472 *Md : 1950)*. 2015;195(10):4742-52.
- 473 31. Suto A, Wurster AL, Reiner SL, Grusby MJ. IL-21 inhibits IFN-gamma production in developing  
474 Th1 cells through the repression of Eomesodermin expression. *Journal of immunology (Baltimore,*  
475 *Md : 1950)*. 2006;177(6):3721-7.
- 476 32. Steiner DF, Thomas MF, Hu JK, Yang Z, Babiarz JE, Allen CD, et al. MicroRNA-29 regulates T-  
477 box transcription factors and interferon-gamma production in helper T cells. *Immunity*.  
478 2011;35(2):169-81.
- 479 33. Yang Y, Xu J, Niu Y, Bromberg JS, Ding Y. T-bet and eomesodermin play critical roles in  
480 directing T cell differentiation to Th1 versus Th17. *Journal of immunology (Baltimore, Md : 1950)*.  
481 2008;181(12):8700-10.
- 482 34. Mazzoni A, Maggi L, Siracusa F, Ramazzotti M, Rossi MC, Santarlasci V, et al. Eomes controls  
483 the development of Th17-derived (non-classic) Th1 cells during chronic inflammation. *European*  
484 *journal of immunology*. 2019;49(1):79-95.
- 485 35. Dejean AS, Joulia E, Walzer T. The role of Eomes in human CD4 T cell differentiation: A  
486 question of context. *European journal of immunology*. 2019;49(1):38-41.
- 487 36. Catovsky D, Miliani E, Okos A, Galton DA. Clinical significance of T-cells in chronic lymphocytic  
488 leukaemia. *Lancet (London, England)*. 1974;2(7883):751-2.
- 489 37. Hanna BS, Roessner PM, Yazdanparast H, Colomer D, Campo E, Kugler S, et al. Control of  
490 chronic lymphocytic leukemia development by clonally-expanded CD8(+) T-cells that undergo  
491 functional exhaustion in secondary lymphoid tissues. *Leukemia*. 2019;33(3):625-37.

- 492 38. Herishanu Y, Perez-Galan P, Liu D, Biancotto A, Pittaluga S, Vire B, et al. The lymph node  
493 microenvironment promotes B-cell receptor signaling, NF-kappaB activation, and tumor proliferation  
494 in chronic lymphocytic leukemia. *Blood*. 2011;117(2):563-74.
- 495 39. Mempel TR, Henrickson SE, Von Andrian UH. T-cell priming by dendritic cells in lymph nodes  
496 occurs in three distinct phases. *Nature*. 2004;427(6970):154-9.
- 497 40. Ozturk S, Roessner PM, Schulze-Edinghausen L, Yazdanparast H, Kalter V, Lichter P, et al.  
498 Rejection of adoptively transferred Emicro-TCL1 chronic lymphocytic leukemia cells in C57BL/6  
499 substrains or knockout mouse lines. *Leukemia*. 2019;33(6):1514-39.
- 500 41. Shinkai Y, Rathbun G, Lam KP, Oltz EM, Stewart V, Mendelsohn M, et al. RAG-2-deficient mice  
501 lack mature lymphocytes owing to inability to initiate V(D)J rearrangement. *Cell*. 1992;68(5):855-67.
- 502 42. Arnold SJ, Sugnaseelan J, Groszer M, Srinivas S, Robertson EJ. Generation and analysis of a  
503 mouse line harboring GFP in the Eomes/Tbr2 locus. *Genesis (New York, NY : 2000)*. 2009;47(11):775-  
504 81.
- 505 43. Crawford A, Angelosanto JM, Kao C, Doering TA, Odorizzi PM, Barnett BE, et al. Molecular  
506 and transcriptional basis of CD4(+) T cell dysfunction during chronic infection. *Immunity*.  
507 2014;40(2):289-302.
- 508 44. Sun Z, Fourcade J, Pagliano O, Chauvin JM, Sander C, Kirkwood JM, et al. IL10 and PD-1  
509 Cooperate to Limit the Activity of Tumor-Specific CD8+ T Cells. *Cancer Res*. 2015;75(8):1635-44.
- 510 45. Naing A, Infante JR, Papadopoulos KP, Chan IH, Shen C, Ratti NP, et al. PEGylated IL-10  
511 (Pegilodecakin) Induces Systemic Immune Activation, CD8(+) T Cell Invigoration and Polyclonal T Cell  
512 Expansion in Cancer Patients. *Cancer Cell*. 2018;34(5):775-91 e3.
- 513 46. Brockmann L, Gagliani N, Steglich B, Giannou AD, Kempski J, Pelczar P, et al. IL-10 Receptor  
514 Signaling Is Essential for TR1 Cell Function In Vivo. *Journal of immunology (Baltimore, Md : 1950)*.  
515 2017;198(3):1130-41.
- 516 47. de Weerd I, Hofland T, de Boer R, Dobber JA, Dubois J, van Nieuwenhuize D, et al. Distinct  
517 immune composition in lymph node and peripheral blood of CLL patients is reshaped during  
518 venetoclax treatment. *Blood advances*. 2019;3(17):2642-52.
- 519 48. Lindqvist CA, Christiansson LH, Thorn I, Mangsbo S, Paul-Wetterberg G, Sundstrom C, et al.  
520 Both CD4+ FoxP3+ and CD4+ FoxP3- T cells from patients with B-cell malignancy express cytolytic  
521 markers and kill autologous leukaemic B cells in vitro. *Immunology*. 2011;133(3):296-306.
- 522 49. Porakishvili N, Roschupkina T, Kalber T, Jewell AP, Patterson K, Yong K, et al. Expansion of  
523 CD4+ T cells with a cytotoxic phenotype in patients with B-chronic lymphocytic leukaemia (B-CLL).  
524 *Clin Exp Immunol*. 2001;126(1):29-36.
- 525 50. Yang ZZ, Kim HJ, Villasboas JC, Chen YP, Price-Troska T, Jalali S, et al. Expression of LAG-3  
526 defines exhaustion of intratumoral PD-1(+) T cells and correlates with poor outcome in follicular  
527 lymphoma. *Oncotarget*. 2017;8(37):61425-39.
- 528 51. Quezada SA, Simpson TR, Peggs KS, Merghoub T, Vider J, Fan X, et al. Tumor-reactive CD4(+)  
529 T cells develop cytotoxic activity and eradicate large established melanoma after transfer into  
530 lymphopenic hosts. *The Journal of experimental medicine*. 2010;207(3):637-50.
- 531 52. Patil VS, Madrigal A, Schmiedel BJ, Clarke J, O'Rourke P, de Silva AD, et al. Precursors of  
532 human CD4(+) cytotoxic T lymphocytes identified by single-cell transcriptome analysis. *Sci Immunol*.  
533 2018;3(19).
- 534 53. Reiser J, Sadashivaiah K, Furusawa A, Banerjee A, Singh N. Eomesodermin driven IL-10  
535 production in effector CD8(+) T cells promotes a memory phenotype. *Cellular immunology*.  
536 2019;335:93-102.
- 537 54. Li J, He Y, Hao J, Ni L, Dong C. High Levels of Eomes Promote Exhaustion of Anti-tumor CD8(+)  
538 T Cells. *Frontiers in immunology*. 2018;9(2981):2981.
- 539 55. Im SJ, Hashimoto M, Gerner MY, Lee J, Kissick HT, Burger MC, et al. Defining CD8+ T cells that  
540 provide the proliferative burst after PD-1 therapy. *Nature*. 2016;537(7620):417-21.
- 541 56. Berndt SI, Camp NJ, Skibola CF, Vijai J, Wang Z, Gu J, et al. Meta-analysis of genome-wide  
542 association studies discovers multiple loci for chronic lymphocytic leukemia. *Nat Commun*.  
543 2016;7(1):10933.

- 544 57. Law PJ, Sud A, Mitchell JS, Henrion M, Orlando G, Lenive O, et al. Genome-wide association  
545 analysis of chronic lymphocytic leukaemia, Hodgkin lymphoma and multiple myeloma identifies  
546 pleiotropic risk loci. *Scientific reports*. 2017;7(1):41071.
- 547 58. Kleinstern G, Yan H, Hildebrandt MAT, Vijai J, Berndt SI, Ghesquieres H, et al. Inherited  
548 variants at 3q13.33 and 3p24.1 are associated with risk of diffuse large B-cell lymphoma and  
549 implicate immune pathways. *Human molecular genetics*. 2020;29(1):70-9.
- 550 59. Frampton M, da Silva Filho MI, Broderick P, Thomsen H, Forsti A, Vijayakrishnan J, et al.  
551 Variation at 3p24.1 and 6q23.3 influences the risk of Hodgkin's lymphoma. *Nat Commun*.  
552 2013;4:2549.
- 553 60. Mumm JB, Emmerich J, Zhang X, Chan I, Wu L, Mauze S, et al. IL-10 elicits IFN $\gamma$ -  
554 dependent tumor immune surveillance. *Cancer Cell*. 2011;20(6):781-96.
- 555

556 **Figure legends:**

557 **Figure 1: EOMES-expressing PD-1<sup>+</sup> CD4<sup>+</sup> T-cells are abundant in B-cell Non-Hodgkin lymphoma**  
558 **patients**

559 **A-D)** Blood samples of CLL and DLBCL patients were stained for flow cytometry. **A)** Representative  
560 contour plots as well as percentage, and **B)** absolute numbers of PD-1<sup>+</sup> CD4<sup>+</sup> T-cells per  $\mu$ l blood of CLL  
561 patients and age-matched healthy controls (HC). **C)** Representative contour plots as well as  
562 percentage, and **D)** absolute numbers of PD-1<sup>+</sup> CD4<sup>+</sup> T-cells per  $\mu$ l blood of DLBCL patients and HC.  
563 **E-F)** Single-cell suspensions from lymph node samples of CLL as well as DLBCL patients were analyzed  
564 by flow cytometry. **E)** Representative contour plots as well as percentage of PD-1<sup>+</sup> out of CD4<sup>+</sup> T-cells.  
565 **F)** Representative contour plots as well as frequency of EOMES<sup>+</sup> PD-1<sup>+</sup> cells out of CD4<sup>+</sup> T-cells.  
566 All graphs show mean  $\pm$  SEM. Each dot represents data of an individual patient. Statistical analysis was  
567 performed using Mann-Whitney test. \* $p < 0.05$ , \*\* $p < 0.01$ .

568

569 **Figure 2: PD-1<sup>+</sup> CD4<sup>+</sup> T-cells are enriched in the E $\mu$ -TCL1 mouse model of CLL and co-express EOMES**

570 **A)-B)** Splenocytes of hemizygous E $\mu$ -TCL1 (TCL1) leukemic mice and WT littermates at a median age of  
571 65 weeks were analyzed by flow cytometry. **A)** Representative histogram as well as percentage of PD-  
572 1<sup>+</sup> out of CD4<sup>+</sup> T-cells. **B)** Representative flow cytometry plots and frequency of EOMES<sup>+</sup> PD-1<sup>+</sup> cells of  
573 CD4<sup>+</sup> T-cells. **C)-D)** Leukemic cells of TCL1 mice were transplanted into syngenic WT mice (TCL1 AT) and  
574 splenocytes were analyzed by flow cytometry, 4 weeks after transfer of cells. Representative histogram  
575 or flow cytometry plots, and quantification of the frequency of **C)** PD-1<sup>+</sup> out of CD4<sup>+</sup> T-cells, as well as  
576 **D)** EOMES<sup>+</sup> PD-1<sup>+</sup> out of CD4<sup>+</sup> T-cells.

577 All graphs show mean  $\pm$  SEM. Each dot represents data of an individual mouse. Statistical analysis was  
578 performed using Mann-Whitney test. \*\* $p < 0.01$ , \*\*\* $p < 0.001$ .

579

580 **Figure 3: EOMES is crucial for CLL control by CD4<sup>+</sup> T-cells**

581 *Rag2*<sup>-/-</sup> mice were transplanted i.v. with PBS or 2 x 10<sup>5</sup> CD4<sup>+</sup> T-cells of WT or *Eomes*<sup>-/-</sup> origin on day -1  
582 and the following day with 1 x 10<sup>6</sup> leukemic cells from E $\mu$ -TCL1 mice, and analyzed at indicated  
583 timepoints by flow cytometry. **A)** Absolute numbers of CD5<sup>+</sup> CD19<sup>+</sup> CLL cells in peripheral blood are  
584 shown over time. **B)** Spleen weight at endpoint, 4 weeks after transfer of leukemic cells. **C)** Absolute  
585 numbers of CD4<sup>+</sup> T-cells cells in peripheral blood are depicted over time. **D)** Number of CD4<sup>+</sup> T-cells per  
586 spleen, as well as **E)** number of CD4<sup>+</sup> T-cells per CD5<sup>+</sup> CD19<sup>+</sup> CLL cell are shown. **F)** Percentage of KI-67<sup>+</sup>  
587 out of CD4<sup>+</sup> T-cells.

588 All graphs show mean  $\pm$  SEM. In B) and D)-F), each dot represents data of an individual mouse.  
589 Statistical analysis was performed using Mann-Whitney test. \*p<0.05, \*\*p<0.01, \*\*\*p<0.001.

590

#### 591 **Figure 4: EOMES drives inhibitory co-receptor expression in CD4<sup>+</sup> T-cells**

592 Naïve CD25<sup>-</sup> CD45RB<sup>High</sup> CD4<sup>+</sup> T-cells of *Eomes*-GFP reporter mice (*Eomes*<sup>+GFP</sup>), as well as of mice with  
593 a T-cell-specific deletion of *Eomes* in combination with a GFP reporter (*Eomes* <sup>$\Delta$ T/GFP</sup>) were transferred  
594 into *Rag2*<sup>-/-</sup> mice, and three weeks after adoptive transfer, RNA sequencing of sorted, splenic CD4<sup>+</sup> T-  
595 cell subsets was performed. **A)** Strategy of RNA sequencing analysis of GFP<sup>+</sup> and GFP<sup>-</sup> cells of *Eomes*<sup>+GFP</sup>  
596 (comparison 1) as well as *Eomes* <sup>$\Delta$ T/GFP</sup> mice, depicting also the comparison of GFP<sup>+</sup> cells from *Eomes*<sup>+GFP</sup>  
597 and *Eomes* <sup>$\Delta$ T/GFP</sup> mice (comparison 2). **B)** Heatmap of all differentially expressed genes. **C)** Heatmap  
598 showing differentially expressed, exhaustion-associated surface receptor genes (selected as  
599 differentially expressed in exhausted T-cells (43) filtered by surface expression (GO:0009986)). **D)**  
600 Representative flow cytometry plots of PD-1 and LAG-3 expression in EOMES<sup>+</sup> and EOMES<sup>-</sup> CD4<sup>+</sup> T-cells  
601 and quantification of data. **D)** Flow cytometric analysis showing representative graphs and  
602 quantification of the frequency of the CD44<sup>lo</sup> PD-1<sup>+</sup> population after transfer of *Eomes*<sup>+/+</sup> or *Eomes*<sup>-/-</sup>  
603 CD4<sup>+</sup> T-cells into different or the same *Rag2*<sup>-/-</sup> hosts.

604 Gene expression in heatmaps in C) and D) was row-normalized. Each dot represents data of an  
605 individual mouse. Lines in D) link data of EOMES<sup>-</sup> and EOMES<sup>+</sup> cells from the same animal. Statistical



606 analysis was performed using Mann-Whitney test. Comparison of matched samples was performed  
607 using Wilcoxon matched-pairs signed rank test. \* $p < 0.05$ , \*\*\* $p < 0.001$ , \*\*\*\* $p < 0.0001$ .

608

### 609 **Figure 5: EOMES drives IL-10 production in CD4<sup>+</sup> T-cells**

610 Cells for analyses were prepared as described in Figure 4. **A)** RNA sequencing of sorted, splenic CD4<sup>+</sup>  
611 T-cell subsets was performed. Depicted heatmaps focus on differentially expressed genes related to  
612 GO terms cytokine activity (GO:005125) and cytokine receptor activity (GO:0004896). **B)**  
613 Representative plot with quantification showing IL-10 production by EOMES<sup>+</sup> and EOMES<sup>-</sup> CD4<sup>+</sup> T-cells  
614 3 weeks post transfer into *Rag2*<sup>-/-</sup> hosts as analyzed by intracellular flow cytometry after stimulation  
615 with PMA/ionomycin *ex vivo*. **C-D)** *Eomes*<sup>+/+</sup> or *Eomes*<sup>-/-</sup> CD4<sup>+</sup> T-cells were transferred into **C)** separate,  
616 or **D)** the same *Rag2*<sup>-/-</sup> hosts and stimulated as described in B). *Eomes*<sup>+/+</sup> and *Eomes*<sup>-/-</sup> cells were  
617 distinguished by expression of the congenic marker CD45.1. Graphs show representative expression of  
618 IL-10 and IFN $\gamma$ , as well as quantification of IL-10-producing CD4<sup>+</sup> T-cells. **E-F)** *Rag2*<sup>-/-</sup> mice were  
619 transplanted with CD4<sup>+</sup> T-cells of WT or *Eomes*<sup>-/-</sup> origin on day -1 and the following day with leukemic  
620 cells of E $\mu$ -TCL1 mice, and analyzed by flow cytometry. **F)** Intrinsic production of IL-10-GFP out of PD-  
621 1<sup>+</sup> CD4<sup>+</sup> T-cells shown as representative histogram and quantification. **G)** Splenocytes were stimulated  
622 *ex vivo* with PMA/ionomycin and cytokine expression was analyzed by intracellular flow cytometry.  
623 The graph shows percentage of IFN $\gamma$ -producing cells out of PD-1<sup>+</sup> CD4<sup>+</sup> T-cells.

624 Gene expression in heatmaps in A) was row-normalized. Each dot represents data of an individual  
625 mouse. Lines in B) link data of EOMES<sup>-</sup> and EOMES<sup>+</sup> cells from the same mouse. E)-F) show mean  $\pm$   
626 SEM. Statistical analysis was performed using Mann-Whitney test. Comparison of matched samples  
627 was performed using Wilcoxon matched-pairs signed rank test. \* $p < 0.05$ , \*\* $p < 0.01$ , \*\*\* $p < 0.001$ .

628

### 629 **Figure 6: IL-10R signalling controls CLL development by altering EOMES expression of CD4<sup>+</sup> T-cells**

630 *Rag2*<sup>-/-</sup> mice were transplanted with PBS or CD4<sup>+</sup> T-cells of WT or *IL10Rb*<sup>-/-</sup> origin on day -1 and the  
631 following day with leukemic cells of E $\mu$ -TCL1 mice, and analyzed by flow cytometry. **A)** Absolute

632 numbers of CD5<sup>+</sup> CD19<sup>+</sup> CLL cells in peripheral blood are shown over time. **B)** Spleen weight at  
633 endpoint, 4 weeks after transfer of leukemic cells. **C)** Absolute numbers of CD4<sup>+</sup> T-cells cells in  
634 peripheral blood are depicted over time. **D)** Number of CD4<sup>+</sup> T-cells per spleen, as well as **E)** number of  
635 CD4<sup>+</sup> T-cells per CD5<sup>+</sup> CD19<sup>+</sup> CLL cell are shown. **F)** Percentage of KI-67<sup>+</sup> cells out of CD4<sup>+</sup> T-cells. **G)**  
636 Frequency of PD-1<sup>+</sup> of CD4<sup>+</sup> T-cells depicted as representative histogram and quantification. **H)** MFI of  
637 PD-1 of PD-1-expressing CD4<sup>+</sup> T-cells. **I)** PD-1<sup>+</sup> T-cell subsets based on high (PD-1<sup>hi</sup>) or intermediate (PD-  
638 1<sup>int</sup>) expression of PD-1 were quantified, and percentages of subsets out of total PD-1<sup>+</sup> CD4<sup>+</sup> T-cells are  
639 depicted. **J)** Representative graph and frequency of EOMES<sup>+</sup> PD-1<sup>+</sup> CD4<sup>+</sup> T-cells. **K)** Splenocytes were  
640 stimulated *ex vivo* with PMA/ionomycin and cytokine expression was analyzed by intracellular flow  
641 cytometry. Percentage of IFN $\gamma$ -producing cells out of PD-1<sup>+</sup> CD4<sup>+</sup> T-cells.  
642 All graphs show mean  $\pm$  SEM. In B) and D-K), each dot represents data of an individual mouse. Statistical  
643 analysis was performed using Mann-Whitney. \*p<0.05, \*\*p<0.01, \*\*\*p<0.001. MFI = median  
644 fluorescence intensity.

## Figure 1

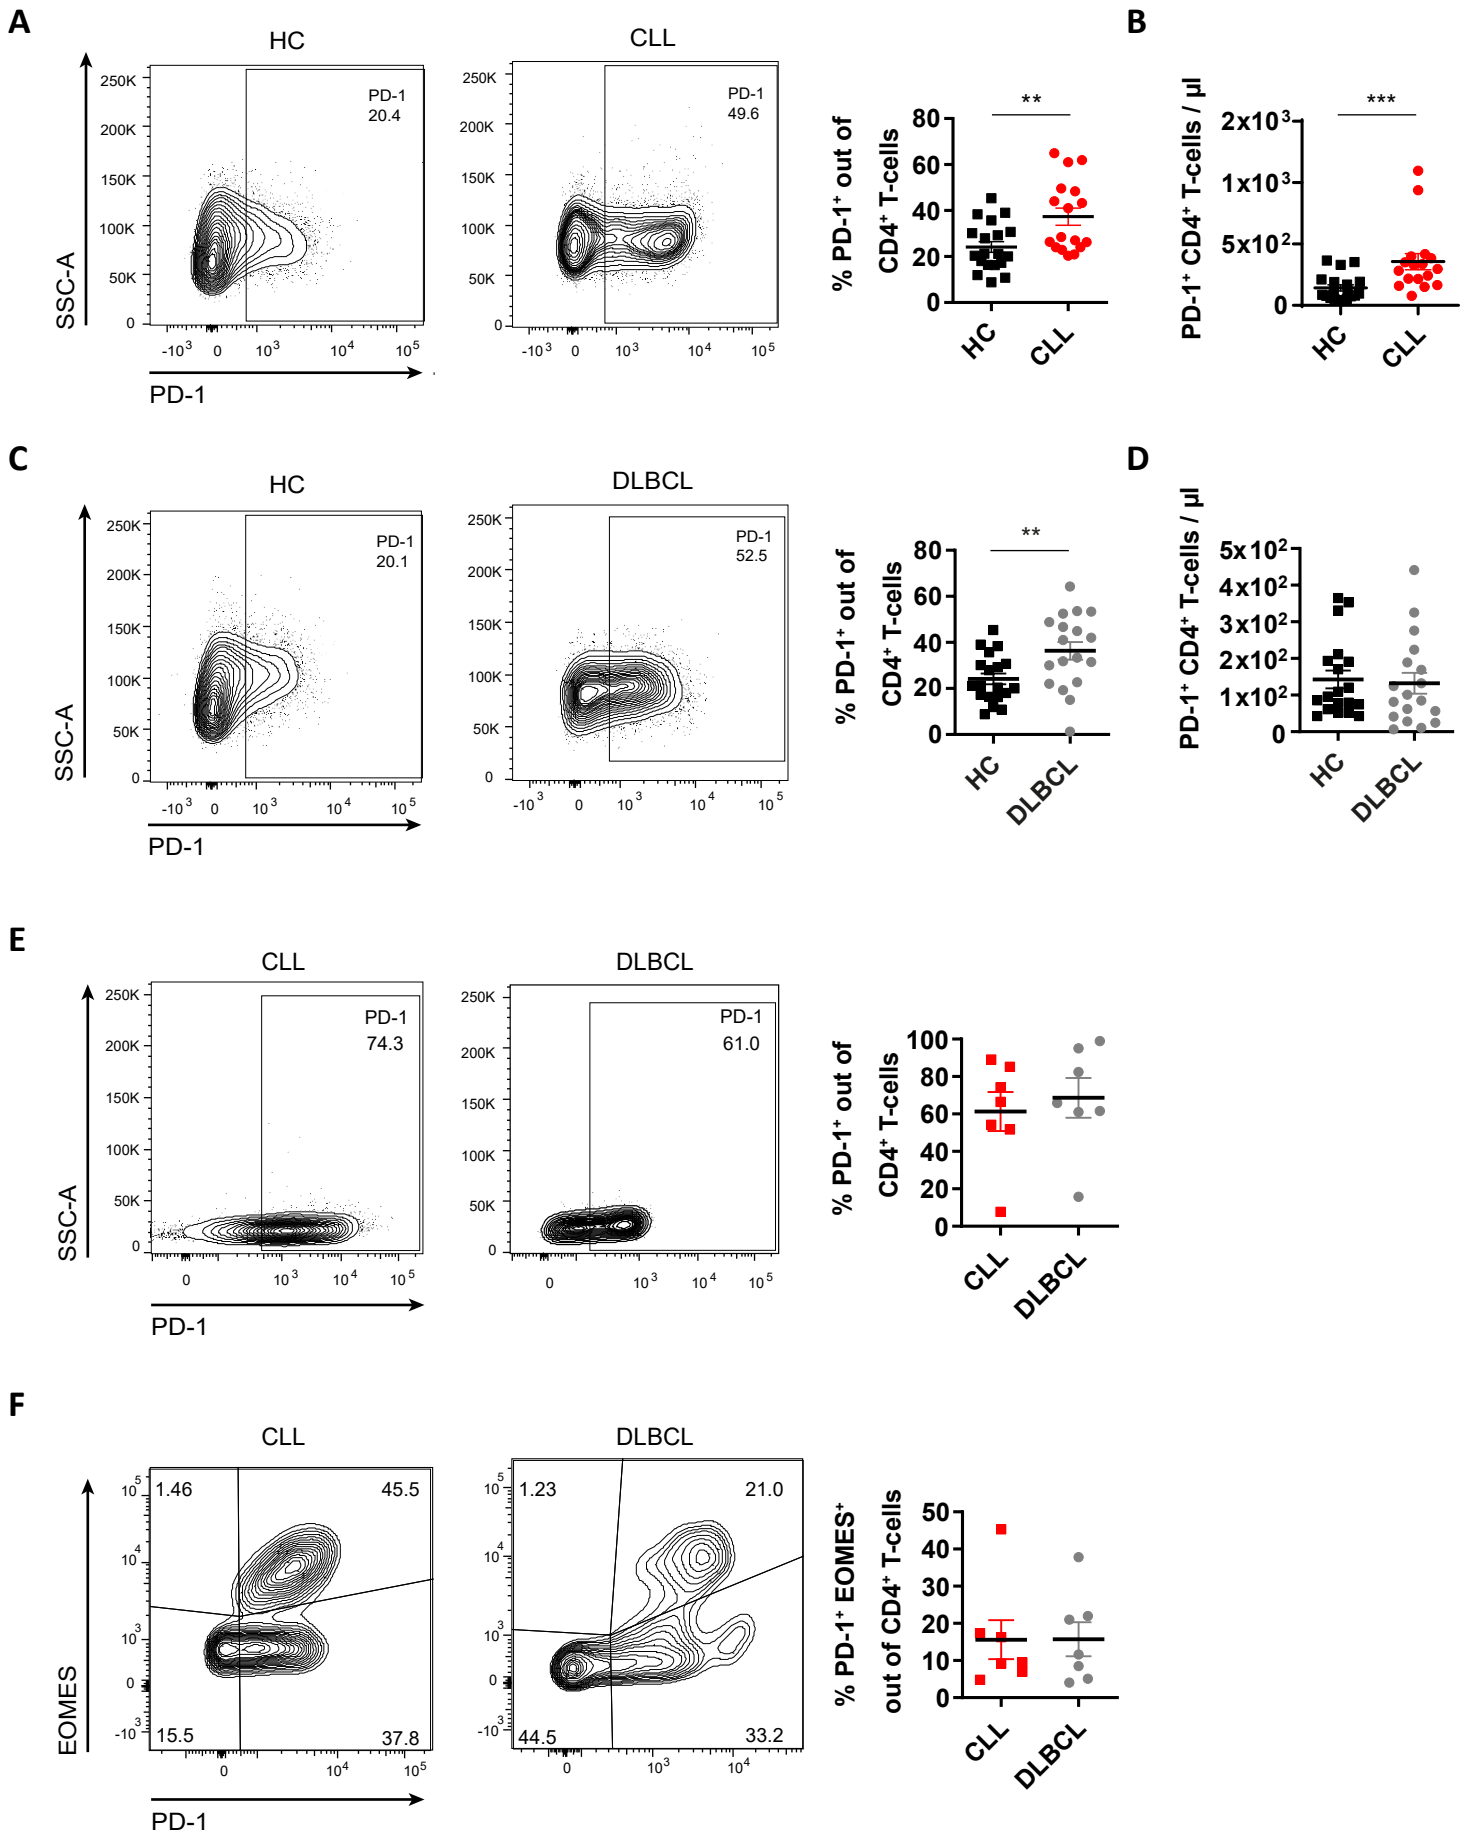

## Figure 2

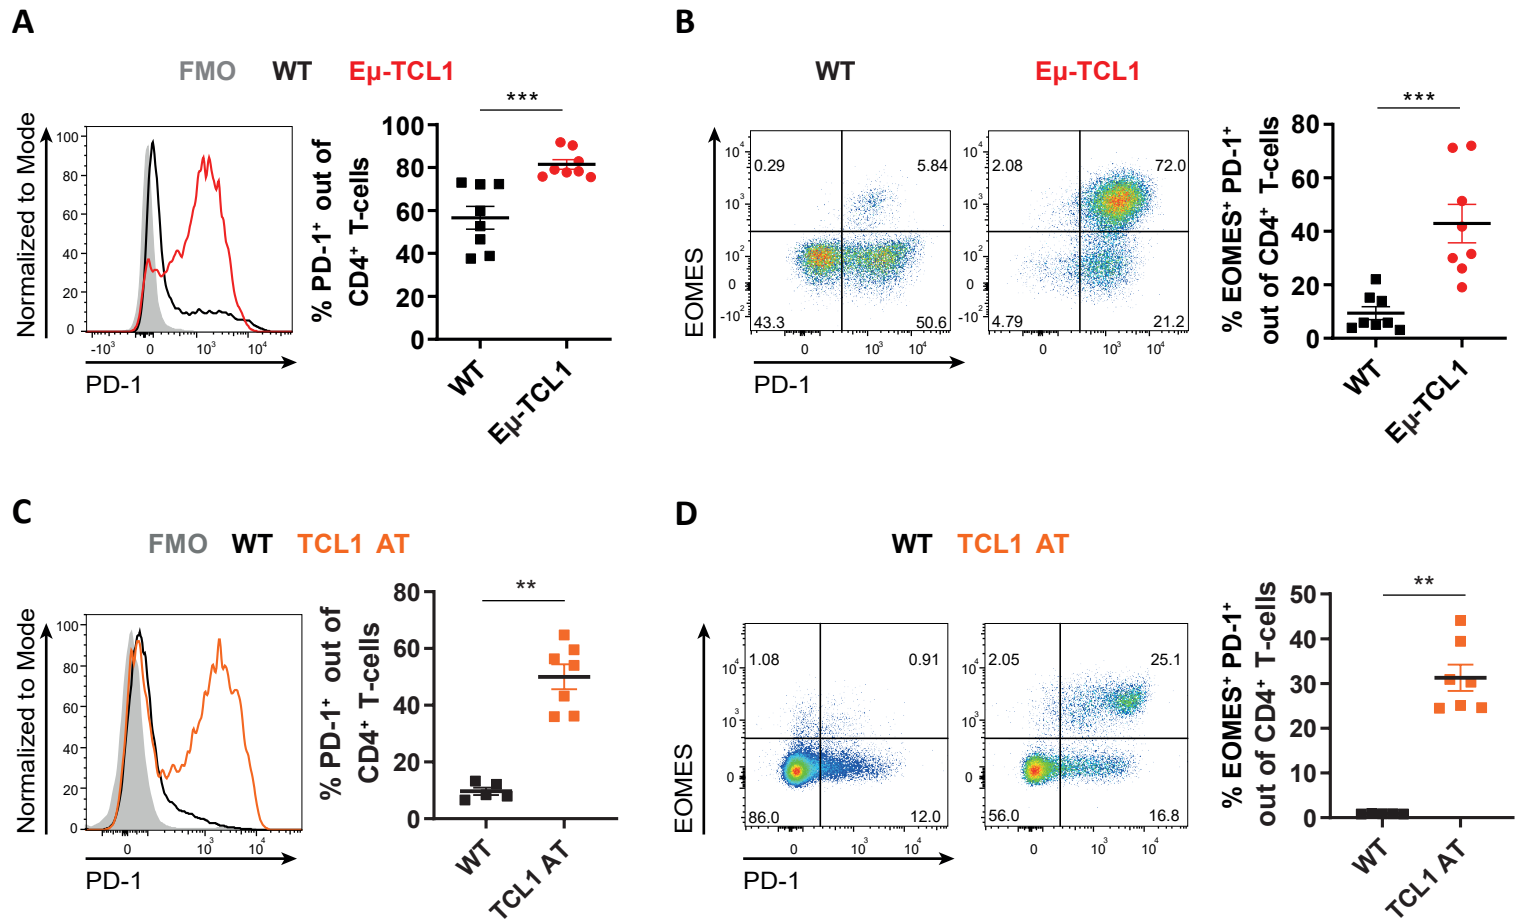

### Figure 3

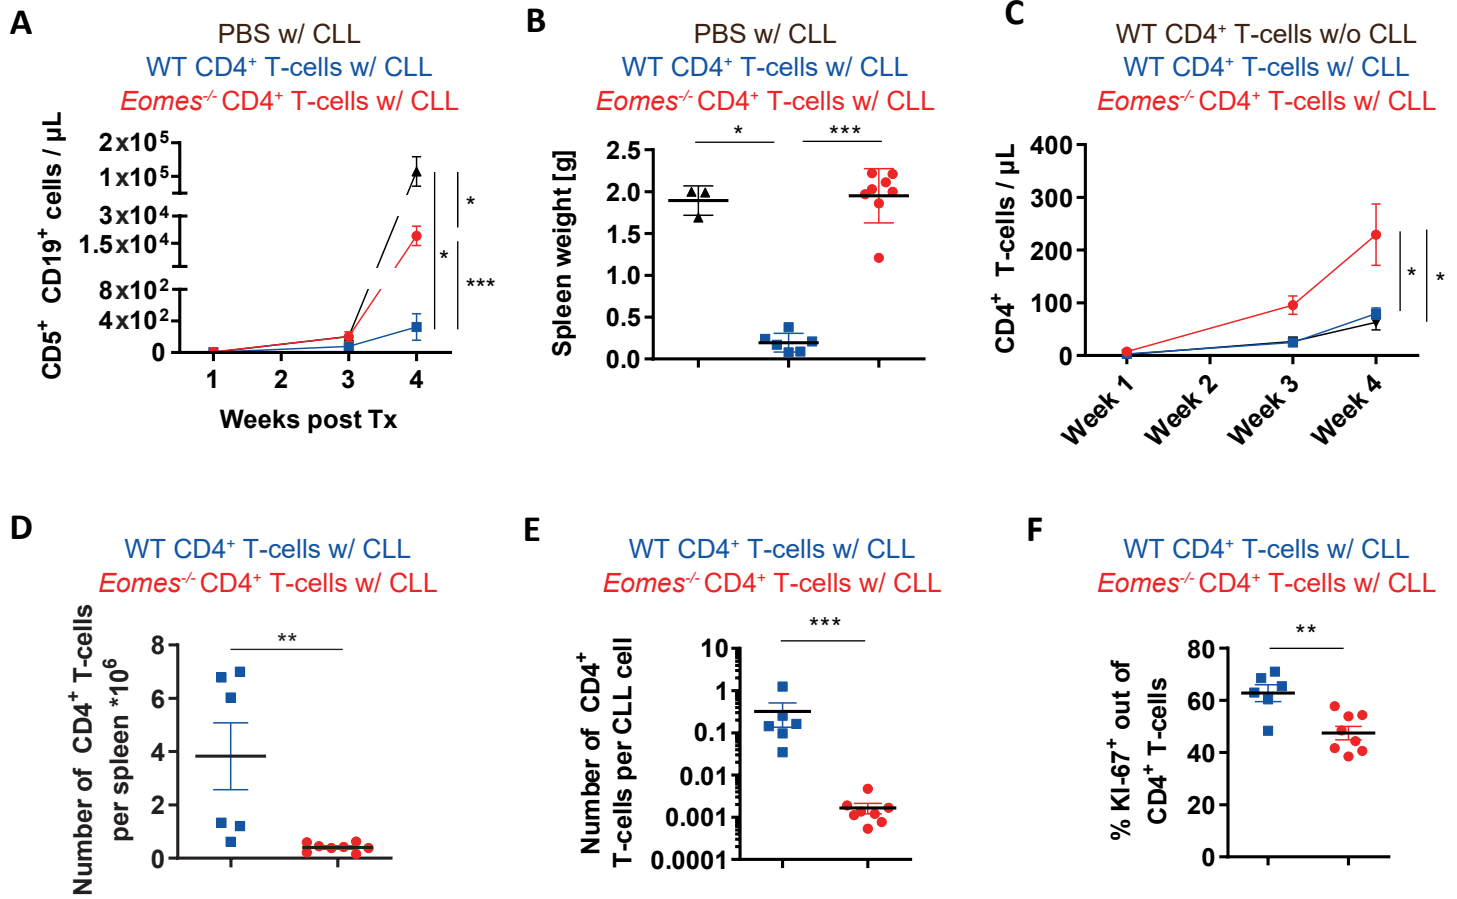

## Figure 4

A

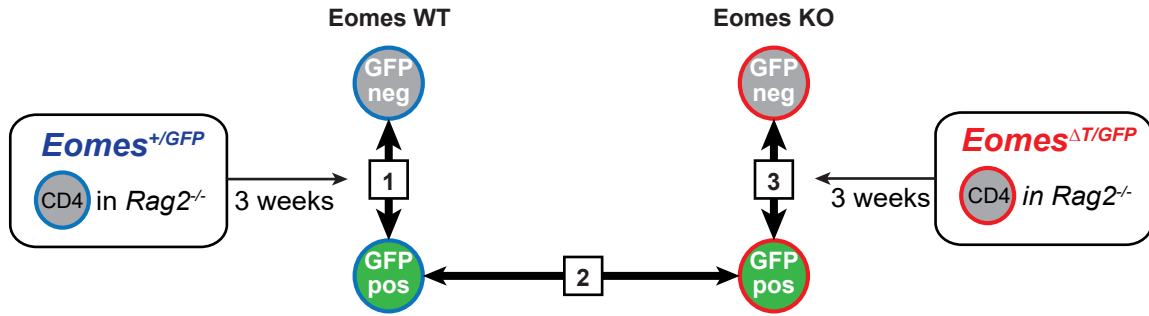

B

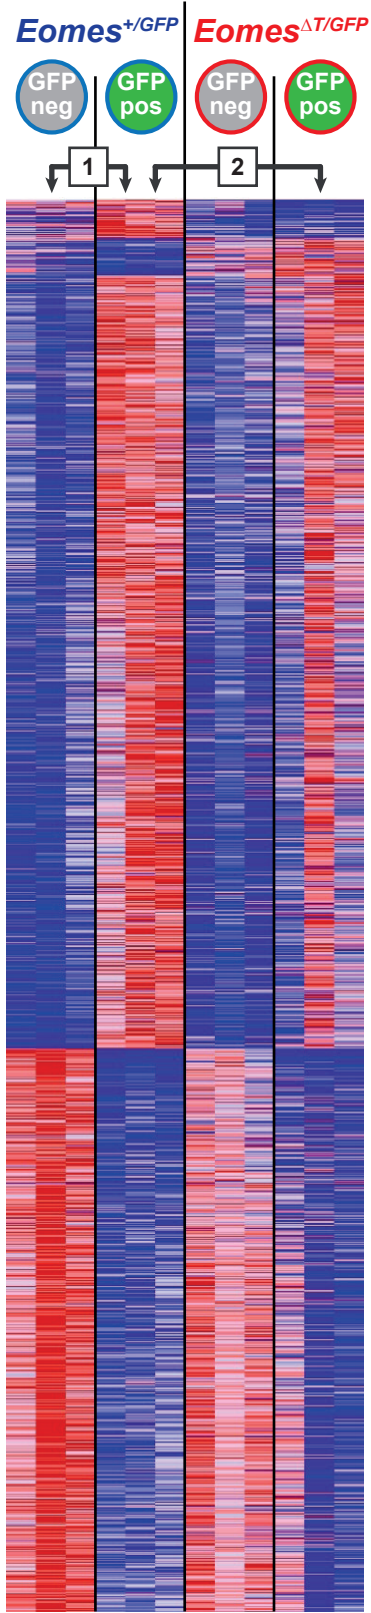

C

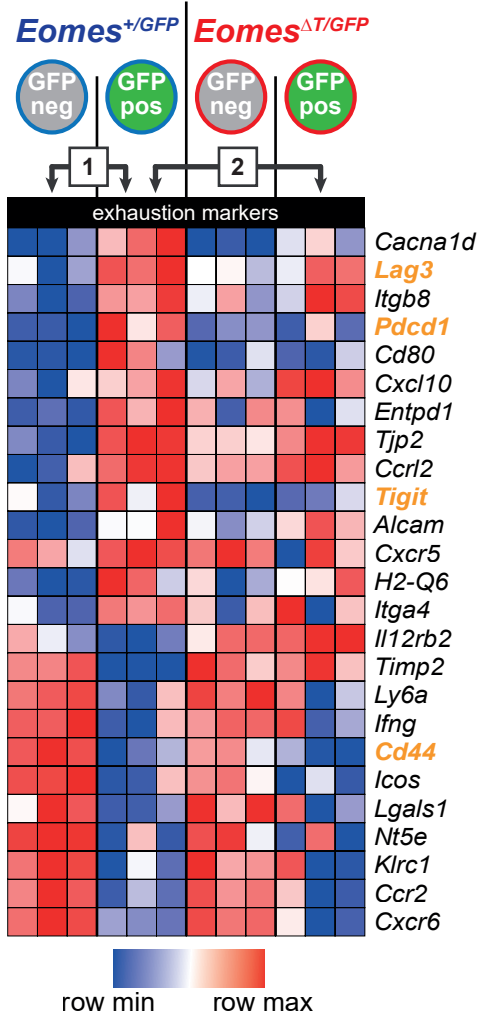

E

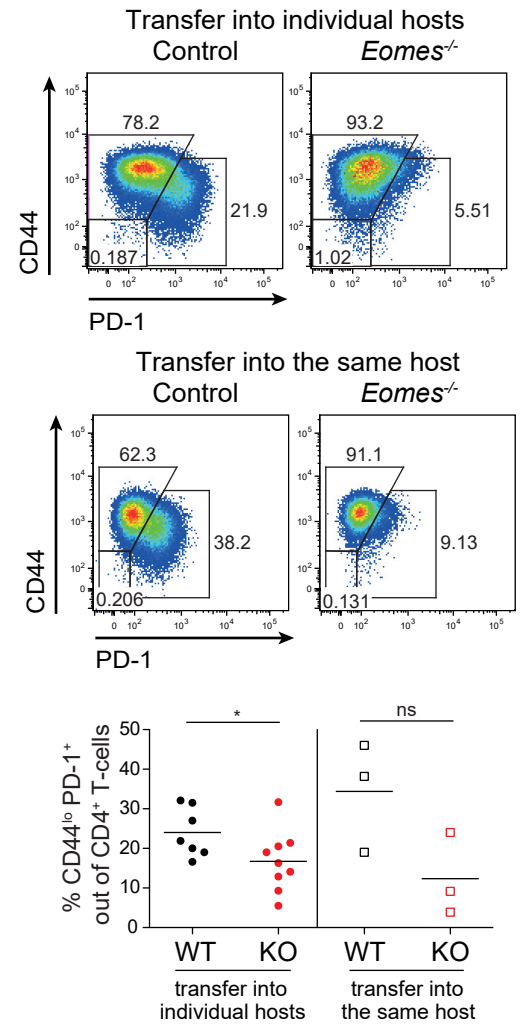

D

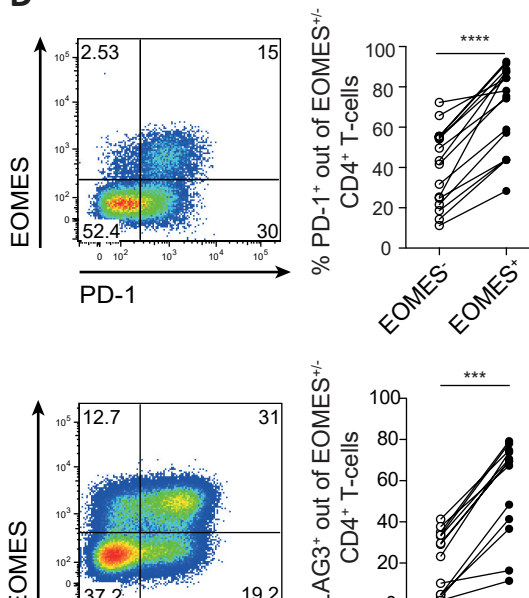

## Figure 5

**A**

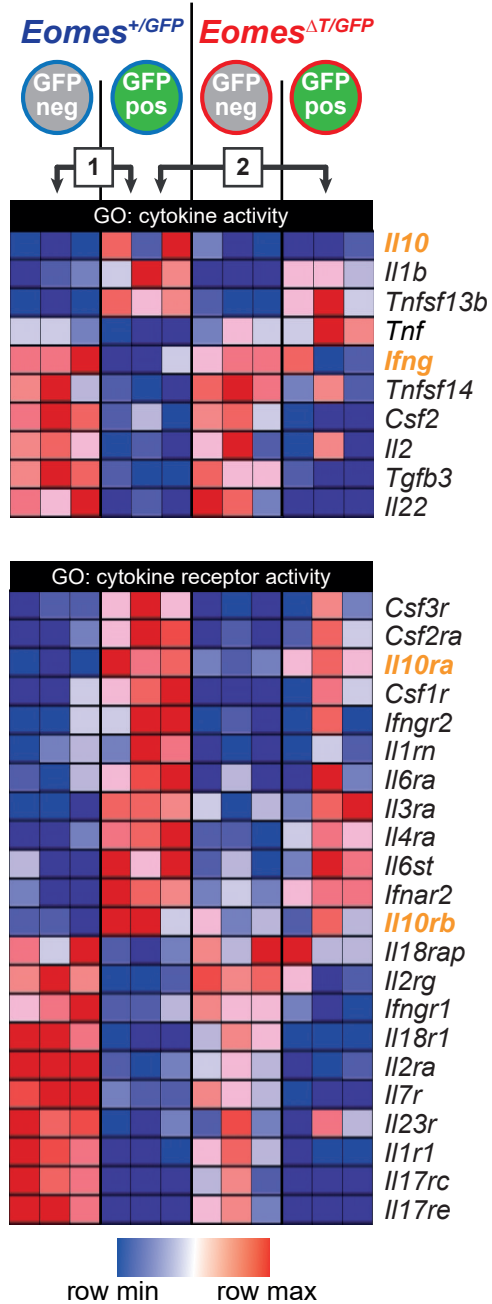

**B**

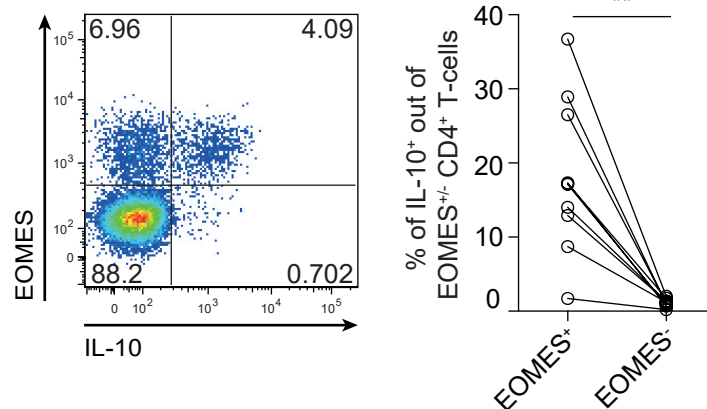

**C**

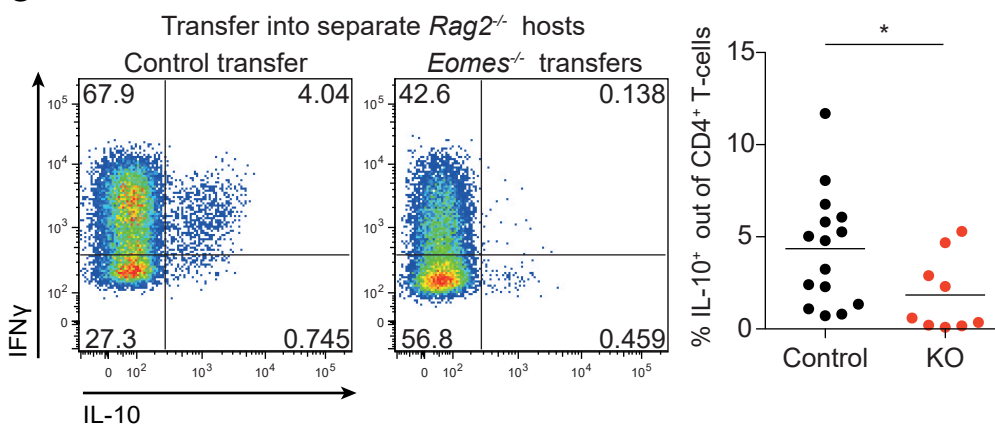

**D**

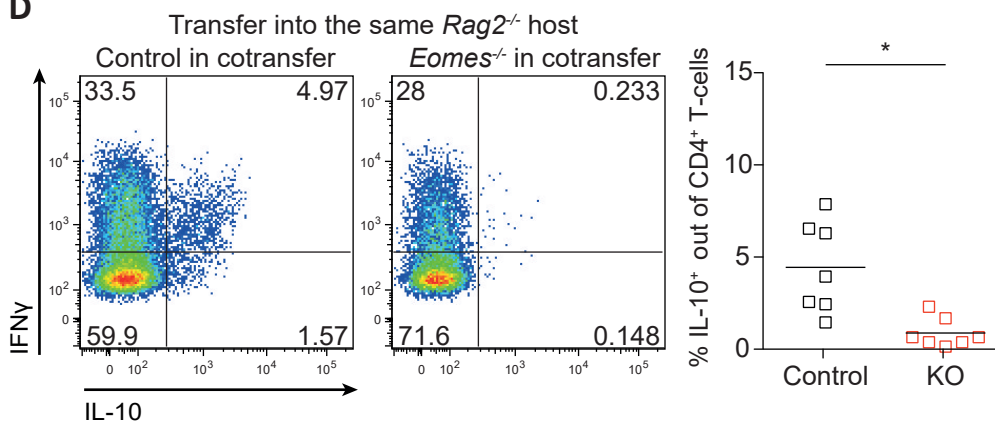

**E**

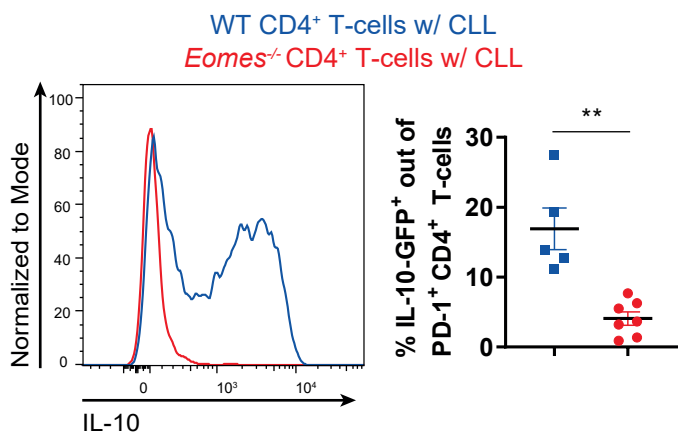

**F**

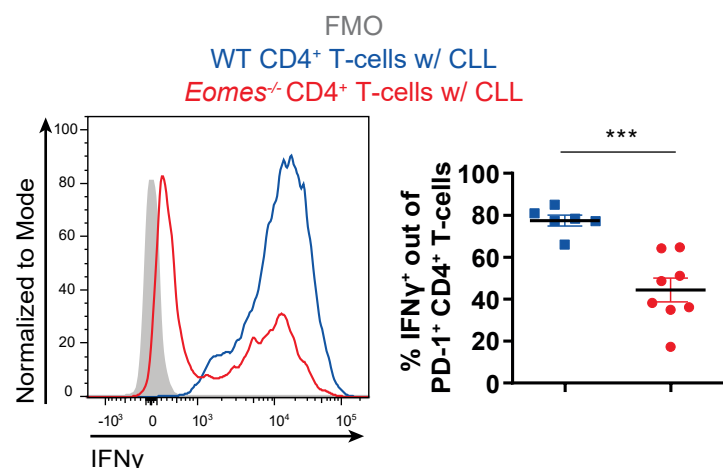

## Figure 6

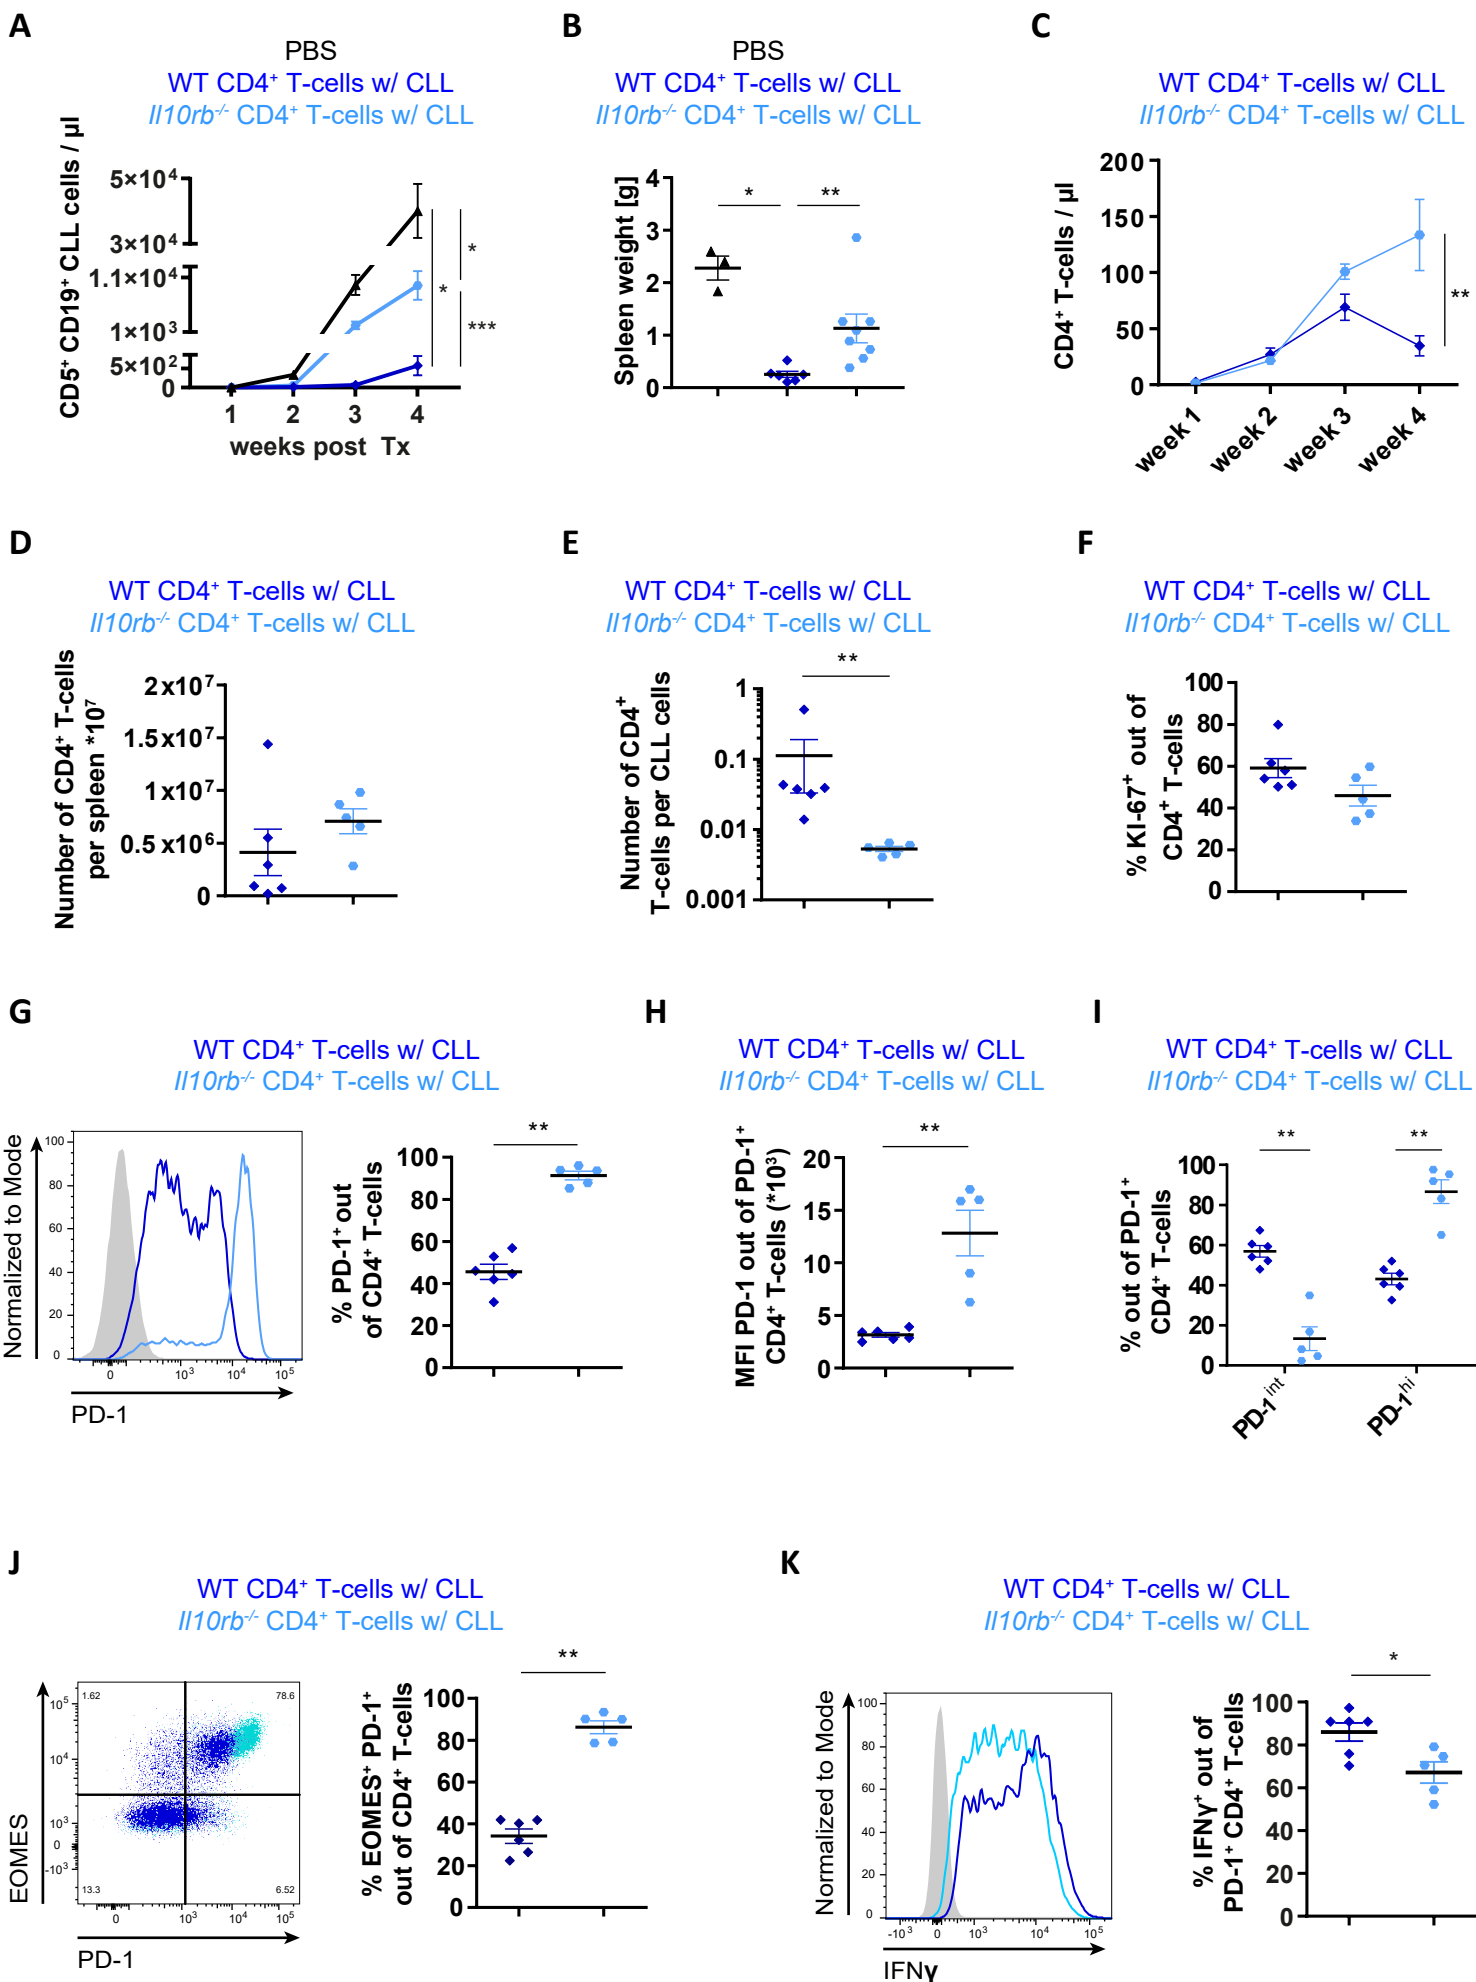

Source: https://www.biorxiv.org/content/biorxiv/early/2020/03/09/2020.03.09.983098.full.pdf
